1 **Title:**

2 Multiplexed and multivariate representations of sound identity during perceptual constancy

3 **Authors:**

4 Stephen M. Town, Katherine C. Wood & Jennifer K. Bizley

5 **Affiliations:**

6 Ear Institute, University College London, 332 Gray's Inn Road, London, WC1X 8EE, UK

7 **Corresponding authors:**

8 Stephen Town (s.town@ucl.ac.uk)

9 Jennifer Bizley (j.bizley@ucl.ac.uk)

## 10 **Summary**

11 Perceptual constancy requires neural representations that are selective for object identity, but  
12 also tolerant for identity-preserving transformations. How such representations arise in the  
13 brain and contribute to perception remains unclear. Here we studied tolerant representations  
14 of sound identity in the auditory system by recording multi-unit activity in tonotopic auditory  
15 cortex of ferrets discriminating the identity of vowels which co-varied across orthogonal  
16 stimulus dimensions (fundamental frequency, sound level, location and voicing). We found  
17 that neural decoding of vowel identity was most successful across the same orthogonal  
18 dimensions over which animals generalized their behavior. We also decoded orthogonal  
19 sound features and behavioral variables including choice and accuracy to show a  
20 behaviorally-relevant, multivariate and multiplexed representation of sound, with each  
21 variable represented over a distinct time-course. Finally, information content and timing of  
22 sound feature encoding was modulated by task-engagement and training, suggesting that  
23 tolerant representations during perceptual constancy are attentionally and experience-  
24 dependent.

## 25 **Keywords**

26 Perceptual constancy, hearing, auditory cortex, ferret, behavior, electrophysiology, attention,  
27 learning, vowel

## 28 **Introduction**

29           Perceptual constancy, also known as perceptual invariance, is the ability to recognize objects  
30 across variations in sensory input such as a face from multiple angles or a word spoken by different  
31 talkers (Bizley and Cohen, 2013; Logothetis and Sheinberg, 1996). Perceptual constancy requires that  
32 sensory systems such as vision and hearing develop a level of tolerance to identity preserving  
33 transformations (DiCarlo and Cox, 2007; DiCarlo et al., 2012). In hearing, the development of  
34 tolerance is critical to the representation of sounds such as individual words or phonemes across  
35 talkers, voice pitch, background noise and other acoustic transformations (Sharpee et al., 2011) and  
36 is a key step in auditory object formation and scene analysis (Bizley and Cohen, 2013; Bregman,  
37 1990; Griffiths et al., 2004).

38           Both humans and other animals perceive sound features constantly despite variation in  
39 sensory input: we can recognize loudness across variation in location (Zahorik and Wightman, 2001),  
40 frequency across sound level (Polley et al., 2006) and sound identity across talkers (Kojima and  
41 Kiritani, 1989; Ohms et al., 2010), vocal tract length (Ghazanfar et al., 2007; Schebesch et al., 2010;  
42 Smith et al., 2005) and fundamental frequency (F0)(Bizley et al., 2013a; Honorof and Whalen, 2010;  
43 Town et al., 2015). At the neural level, tolerance emerges within auditory cortex for sounds including  
44 vocalizations (Billimoria et al., 2008; Carruthers et al., 2015; Meliza and Margoliash, 2012), pure  
45 tones (Sadagopan and Wang, 2008) and pulse trains (Bendor and Wang, 2007). Auditory cortical  
46 neurons are modulated by multiple features of speech sounds, such as synthesized vowels (Bizley et  
47 al., 2009), and when variables are considered in discrete time windows, tolerant responses of vowel  
48 identity, as well as information about sound location and F0 can be recovered (Walker et al., 2011).  
49 However, tolerance has yet to be shown in subjects actively demonstrating perceptual constancy,  
50 and the behavioral relevance of tolerant representations in auditory cortex remains unclear.  
51 Furthermore, although auditory cortical processing is modulated by attention and experience  
52 (Osmanski and Wang, 2015), it is unknown how these processes affect tolerant representations.

53           Here we asked if tolerant representations exist in auditory cortex during perceptual  
54 constancy, how tolerance was related to behavior, and modulated by attention and experience. To  
55 address these questions, we recorded the activity of auditory cortical neurons in ferrets  
56 discriminating synthesized vowel sounds across identity-preserving, orthogonal acoustic  
57 transformations - including variations in F0, sound location, level and voicing.

58           We hypothesised that auditory cortical neurons would show tolerance across the same  
59 range of orthogonal variables over which animals demonstrate perceptual constancy, and that such  
60 tolerance would be degraded in cases where animals failed to generalize vowel identity. As auditory  
61 cortex represents multiple stimulus variables, we expected tolerance to be accompanied by  
62 information about both task-relevant and irrelevant sound features. Finally, we predicted that the  
63 neural correlates of perceptual constancy should be dependent on an animal's behavioral  
64 performance, attentional state and training. Our findings confirmed that neurons could represent  
65 vowel identity across orthogonal variations and thus provide tolerant representations in perceptual  
66 constancy. Furthermore, we also demonstrated these representations were sensitive to behavioral  
67 performance, failures to perceive vowel constancy, attentional state and long-term experience.

## 68 Results

### 69 Perceptual constancy during vowel discrimination

70 To establish a behavioral model of perceptual constancy, ferrets were trained in a two-  
71 choice task (Fig 1A) to identify synthesized vowels varying in F0 (149 – 459 Hz), location ( $\pm 90^\circ$ ),  
72 sound level (45 – 82.5 dB SPL), or voicing (in which vowels were generated to sound whispered and  
73 presented on 20% of trials as probe trials). Changes in these task-irrelevant orthogonal dimensions  
74 produced different spectra while preserving the formants peaks in the spectral envelope (Fig 1B)  
75 critical for vowel identification (Peterson and Barney, 1952; Town and Bizley, 2013). On each trial,  
76 the animal visited a central port to trigger presentation of the stimulus: two tokens of *the same*  
77 vowel, each lasting 250 ms with an inter-stimulus interval of 250 ms. Subjects then responded at a  
78 left / right spout depending on vowel identity, with correct responses rewarded with water and  
79 errors leading to a brief timeout (1-5 s). In each test session, vowels varied across only one  
80 orthogonal dimension (i.e. F0, level, location or voicing). Variation in each orthogonal dimension was  
81 sufficient that had the animals been discriminating these acoustic features performance would have  
82 been at, or close to, ceiling (Hine et al., 1994; Sinnott et al., 1992; Walker et al., 2011; Walker et al.,  
83 2009; Wood et al., 2017).

84 Ferrets discriminated vowels accurately across orthogonal dimensions: Performance was  
85 consistent across F0s (Fig 1C) and across locations (Fig 1D) (no effect of orthogonal dimension,  
86 logistic regression,  $p > 0.05$ , Table S1) and significantly better than chance at each F0 and location  
87 tested (binomial test vs. 50%,  $p < 0.001$ , Table S2). For all sound levels, performance was also better  
88 than chance (Fig 1E and Table S2), however performance increased significantly (but moderately)  
89 with sound level in 3 / 4 ferrets ( $p < 0.01$ ; Table S1). Nevertheless performance was constant over a  
90 range of intensities and performance at lowest sound levels still exceeded chance. In contrast to the  
91 other orthogonal dimensions, ferrets failed to generalize across voicing: performance was  
92 significantly worse for whispered than voiced vowels (Fig 1F) and only two ferrets discriminated

93 whispered stimuli better than chance (Table S2). These results confirmed that ferrets perceived a  
94 constant vowel identity across variations in acoustic input related to F0, sound location and sound  
95 level but not voicing, and so we predicted that we would find tolerant representations of vowel  
96 identity across changes in F0, location and sound level.

---

97 **Figure 1 Perceptual constancy during vowel discrimination**

98 **(A)** Schematic of task design: Animals initiated trials by visiting a central port (C) and waiting for a  
99 variable period before stimulus presentation. Speakers (S) presented sounds (two tokens *of the*  
100 *same* vowel; blue) to the left and right of the head in all conditions except when sound varied across  
101 location - in which case they were presented from either left (S<sub>L</sub>) or right (S<sub>R</sub>) speaker only. Animals  
102 responded at the left or right spout depending on vowel identity. **(B)** Spectra for 13 examples of one  
103 vowel /u/ with varying F0, location, sound level and voicing. Spectra for sounds across location were  
104 generated in virtual acoustic space (Schnupp et al., 2003) although sounds varied in free-field  
105 location. **(C-F)** Behavioral performance when discriminating vowels across F0 (C), location (D), level  
106 (E) and location (F). Individual subjects are shown as separate lines.

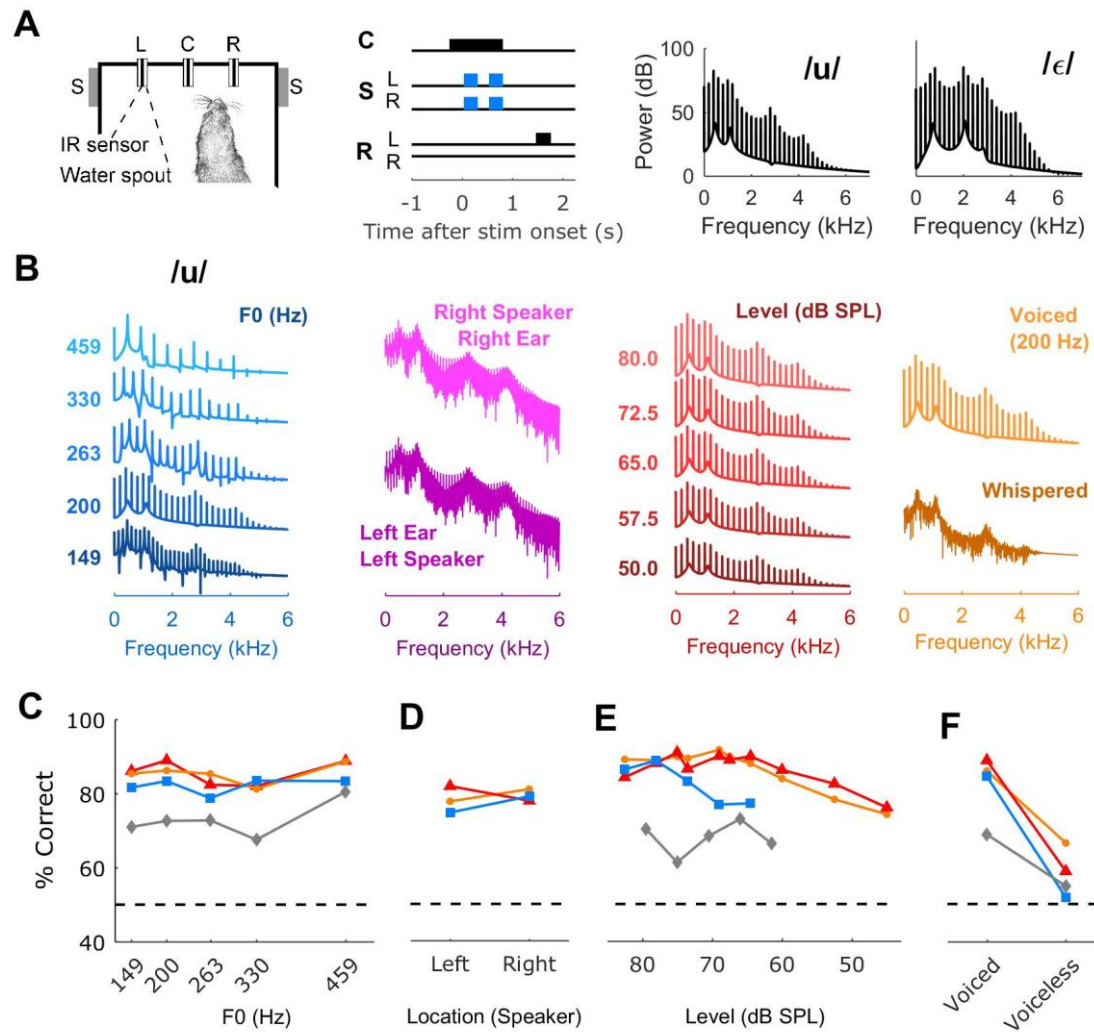

107

## 108 Decoding sound features

109 We implanted arrays of independently moveable tungsten microelectrodes in left and right  
 110 auditory cortex, where electrodes targeted the low frequency reversal between tonotopic primary  
 111 and posterior fields (Bizley et al., 2005; See Fig S2 in Town et al., 2017). We recorded 471 sound-  
 112 responsive multi-units and, for each unit, measured responses to vowels across F0, sound location,  
 113 level and voicing during task performance (Fig 2A). We quantified the information available about  
 114 vowel identity, F0, etc., by decoding stimulus features in one dimension across changes in the  
 115 orthogonal dimension from single trial responses. Our decoder compared the Euclidean distances of  
 116 time-varying patterns of neural activity, with leave-one-out cross validation (Foffani and Moxon,  
 117 2004)(Fig S1A). The time window over which responses were decoded was variable and we searched

118 for those parameters (start time and window duration) that gave best decoding performance (Fig  
119 S1B). Optimization significantly improved decoding performance (Fig S2, rank-sum,  $p < 0.001$ ) and  
120 enabled comparison of the time windows over which units were maximally informative. We decoded  
121 responses from correct trials only as we reasoned these would provide the clearest demonstration  
122 of auditory cortical encoding. For each unit, we reported decoding performance (Fig 2B) and  
123 whether the unit could be classified as significantly informative as determined by a permutation test  
124 ( $p < 0.05$ , Fig 2C and Fig S1C), indicating that the unit provided a tolerant representation of vowel  
125 identity across variation in sensory input resulting from changes in orthogonal dimensions.

126 We found that the proportion of vowel informative units was highest across dimensions  
127 over which behavioral performance was most constant. Across variation in F0, 42.1% of units  
128 (154/366) were informative about vowel identity, 43.5% (50/115) were informative across varying  
129 sound location and 40.6% (80/197) across varying sound level, whereas only 30.4% (63/207) were  
130 informative about vowel identity across voicing (Fig 2C). Furthermore, when we decoded vowel  
131 identity at each orthogonal value (Fig 2D) we found that the proportion of vowel informative units  
132 was independent of variation in F0 (logistic regression,  $\chi^2 = 0.776$ ,  $p = 0.378$ ), location ( $\chi^2 = 2.17$ ,  $p =$   
133  $0.140$ ), level ( $\chi^2 = 0.447$ ,  $p = 0.504$ ) and voicing ( $\chi^2 = 0.983$ ,  $p = 0.321$ ). Together this suggests that  
134 auditory cortical neurons provide representations of vowel identity that are tolerant to variations in  
135 acoustic input caused by changes in F0, sound location and level, and to a lesser extent, voicing.

### 136 **Conserved information content**

137 If units that represent vowel identity across one orthogonal dimension provide a truly  
138 tolerant representation, they should also represent vowel identity across multiple orthogonal  
139 dimensions. To test this, we counted the number of sound-responsive units from the entire recorded  
140 population that were vowel informative across F0, sound location, level and / or voicing.

141 While not every unit was tested across every orthogonal dimension, we found that units  
142 remained informative about vowel identity across the dimensions (F0, sound location and level) over



143 which behavioral performance was constant (Fig 2E). Across sound level and location, 38.6% of units  
144 (22/57) were vowel informative across both dimensions. This value was close to the proportion of  
145 units sensitive to vowel identity across level or location (which were 40% and 43% respectively),  
146 indicating that the majority of vowel informative units represented sound identity across both  
147 orthogonal dimensions. Similarly, 34.8% of units (54/155) were informative about vowel identity  
148 across F0 and level, 34.4% of units (32/93) across F0 and location and 37.0% of units (20/54) were  
149 informative across all of F0, sound level and location. In contrast, notably fewer units (<22.5%) were  
150 informative about vowel identity over the other combinations of orthogonal factors – of which all  
151 included voicing, and across which, animals also generalized poorly. These findings suggest that a  
152 sizeable subpopulation of units provide tolerant information about vowel identity across orthogonal  
153 dimensions during perceptual constancy.

#### 154 **Encoding of orthogonal dimensions**

155 In addition to encoding vowel information during perceptual constancy, we also asked if  
156 neural responses conveyed information about orthogonal features of sounds that were irrelevant for  
157 task performance (Fig 2D). When considering all F0s or sound levels, we found 21.3% of units  
158 (78/366) were informative about F0 across vowels, and 24.9% (49/197) about sound level. These  
159 proportions increased to 38.5% (142/369) across F0; and 40.3% (29/72) across sound level when we  
160 decoded across the most extreme orthogonal values tested (149 vs 459 Hz or 45 vs 75 dB SPL). While  
161 a similar percentage of units (38.3%, 44/115) were informative about sound location, a greater  
162 proportion of units (50.7%, 105/207) were informative about voicing. Thus, the balance of units  
163 encoding task relevant and orthogonal dimensions was important for perceptual constancy: the  
164 proportion of units conveying information about vowel identity was greater than (F0, level) or  
165 similar to (location) the dimensions over which animals generalized, whereas across voicing, the  
166 balance of informative units was shifted towards the orthogonal dimension (50% to 30%; Fig. 2C).

167 We also tested whether units that were informative about one orthogonal variable (e.g.  
168 sound location) were also informative about other orthogonal variables (e.g. voicing). While we  
169 observed that some units were informative about multiple orthogonal dimensions (Fig 2F), such  
170 groups were significantly smaller than the corresponding analysis of vowel identity (sign-rank test on  
171 proportion of conserved units,  $p = 0.0098$ ). Thus, while information about vowel identity was  
172 conserved *across* orthogonal dimensions, few units were informative about *multiple* orthogonal  
173 dimensions.

---

174 **Figure 2 Neural responses and decoding acoustic features**

175 **(A)** Raster and peri-stimulus time histograms (PSTHs) of neural responses of one unit to vowels  
176 across orthogonal variation in F0, location, level and voicing. Data plotted during presentation of the  
177 first sound token (grey bar) by vowel identity and by the orthogonal variable. PSTHs show mean  $\pm$   
178 s.e.m. firing rate. **(B)** Decoding performance when reconstructing vowel identity and orthogonal  
179 values from single trial responses of individual units. Data points indicate the best decoding  
180 performance of each unit. Chance performance for vowel identity, location and voicing was 50% and  
181 20% for F0 and sound. **(C)** Number of units informative about vowel identity and / or orthogonal  
182 values when considering responses across all orthogonal values tested. **(D)** Decoder performance  
183 and proportion of vowel informative units at each orthogonal value. For sound level, different  
184 shades reflect the distinct sound ranges over which units were tested. **(E)** Number of units classified  
185 as vowel informative *across* multiple orthogonal dimensions. **(F)** As E but for units classified as being  
186 informative *about* multiple orthogonal dimensions.

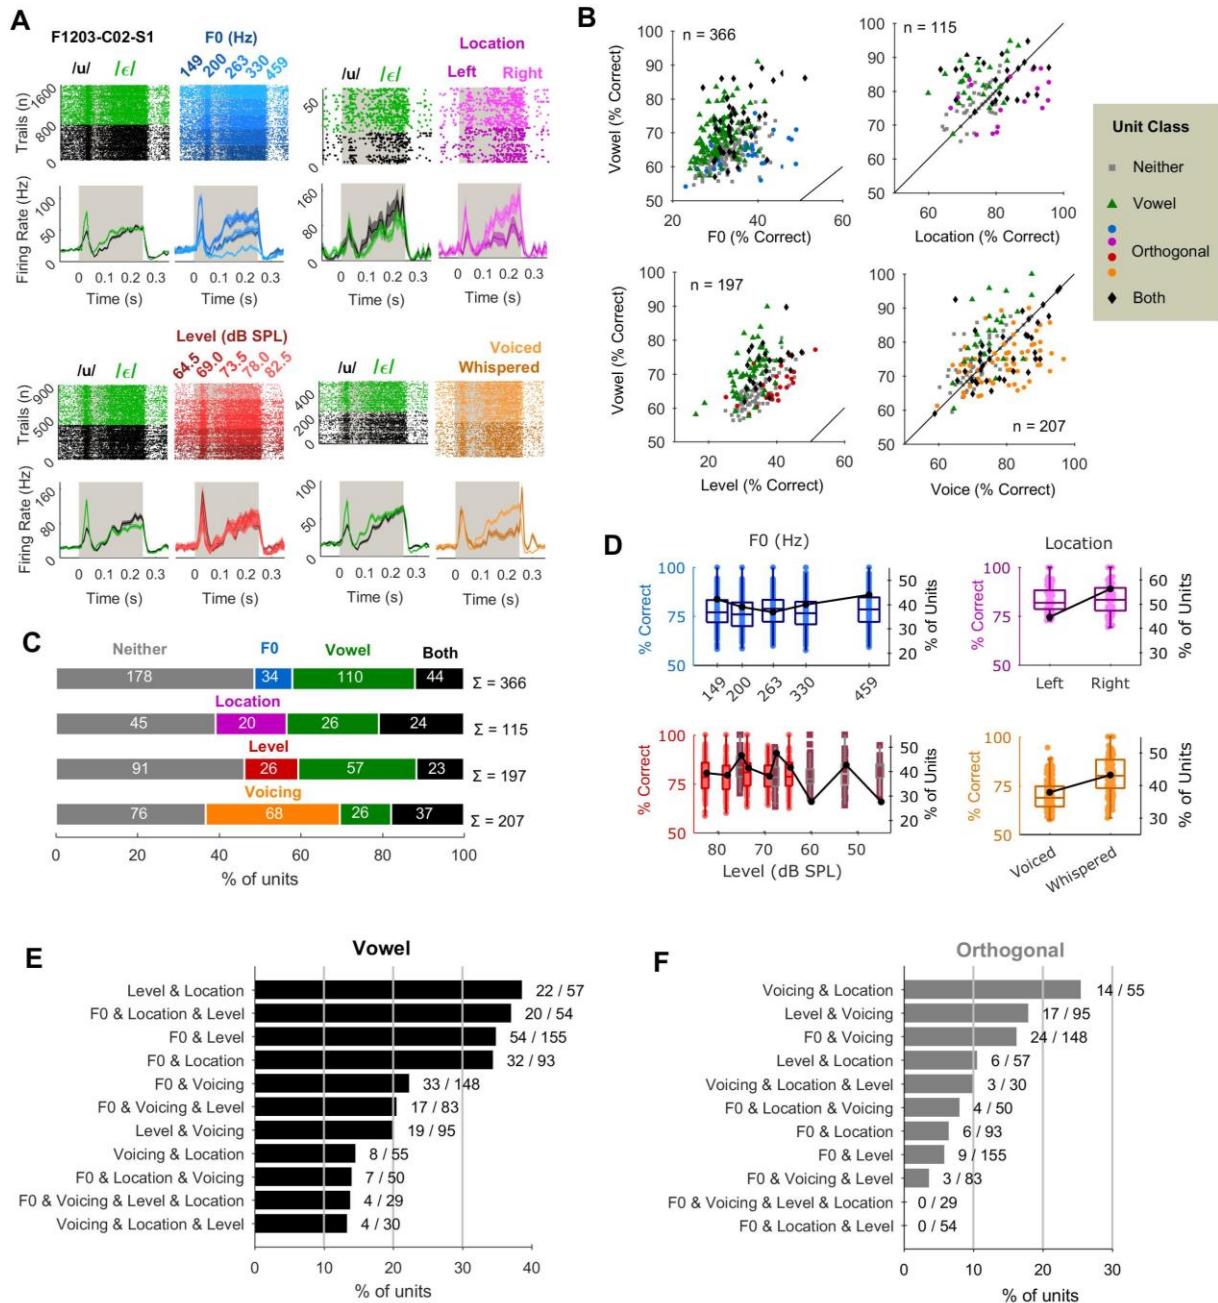

187

188

## 189 Temporal multiplexing of sound features

190 Our data show that multiple sound features are represented in auditory cortex, in some  
 191 cases by the same neurons. Multivariate encoding in auditory cortex has been linked to temporal  
 192 multiplexing, where units encode information about different stimulus features at distinct time  
 193 points (Walker et al., 2011). We therefore asked whether multiplexing occurred during perceptual

194 constancy and if the representation of vowel identity across orthogonal features was matched by  
195 conserved timing of information.

196 To study multiplexing, we compared the time windows that gave best performance decoding  
197 each stimulus feature following optimization. A time window was defined by its start time and  
198 duration, which we summarized as its midpoint (start time + duration/2). For each unit, we  
199 measured the midpoint for best decoding vowel identity across each orthogonal dimension, and for  
200 decoding each orthogonal dimension across vowel identity. We then compared cumulative  
201 distribution functions (CDFs) of midpoints across units that were informative about multiple stimulus  
202 features (dual-feature units) or only one feature (single-feature units).

203 We first confirmed the occurrence of multiplexing during perceptual constancy, finding that  
204 for dual-feature units, information about each feature emerged over a distinct time-course.  
205 Information about vowel identity arose significantly earlier than F0 (Fig 3A, Sign-rank test:  $z = -2.43$ ,  
206  $p = 0.015$ ) and sound level (Fig 3C,  $z = -2.13$ ,  $p = 0.033$ ) whereas information about sound location  
207 arose significantly earlier than vowel identity (Fig 3B,  $z = 2.26$ ,  $p = 0.024$ ). In contrast, there was no  
208 significant difference in the timing of vowel identity and voicing ( $z = 1.33$ ,  $p = 0.184$ ). Thus  
209 multiplexing in these units only occurred for sounds that animals showed perceptual constancy.

210 For single-feature units, vowel identity was also best decoded earlier than F0 (Wilcoxon  
211 rank-sum test:  $z = -2.31$ ,  $p = 0.021$ ) but the differences between decoding of vowel identity and  
212 sound level ( $z = -0.933$ ,  $p = 0.351$ ), and vowel identity and location ( $z = 1.29$ ,  $p = 0.198$ ) were not  
213 significant. For single feature units, vowel identity was decoded significantly later than voicing ( $z$   
214  $= 2.79$ ,  $p = 0.005$ ).

215 Across dual-feature units the timing of vowel information was conserved: CDFs did not differ  
216 significantly across orthogonal dimensions (Fig 3E, Kruskal-Wallis test:  $\chi^2 = 5.76$ ,  $p = 0.124$ ). In  
217 contrast, single-feature units showed significant differences in timing of vowel identity information

218 across orthogonal dimensions ( $\chi^2 = 19.95$ ,  $p = 1.74 \times 10^{-4}$ ) with post-hoc comparisons showing that  
219 information about vowel identity across voicing emerged significantly later than across every other  
220 orthogonal factor (Tukey-Kramer corrected, F0:  $p = 0.001$ , location:  $p = 0.002$ , level:  $p = 0.013$ ). Dual-  
221 feature units also encoded information about different orthogonal dimensions at significantly  
222 different times (Fig 3F,  $\chi^2 = 9.77$ ,  $p = 0.012$ ) with post-hoc comparisons showing F0 was decoded  
223 significantly later than location ( $p = 0.020$ ) and voicing ( $p = 0.047$ ). Similar results were also found for  
224 single feature units where encoding of orthogonal dimensions differed significantly in time ( $\chi^2 =$   
225  $11.04$ ,  $p = 0.0206$ ) with post-hoc comparisons showing location was decoded significantly earlier  
226 than F0 ( $p = 0.026$ ) and sound level ( $p = 0.028$ ).

227         These results emphasise an important role for temporal multiplexing: perceptual constancy  
228 only occurred when neurons that were sensitive to multiple stimulus features encoded information  
229 about each dimension in distinct time windows. Moreover, while the relative timing of vowel  
230 information and orthogonal dimensions was not important for generalisation, when vowel  
231 information was shifted in time, as in the case of voicing, perceptual constancy failed. Very similar  
232 results were observed when considering the start time or decoding window duration (Fig S4 and S5).

---

233 **Figure 3 Temporal multiplexing in auditory cortex**

234 **(A-D)** Cumulative distributions showing center times for best performance when decoding vowel  
235 identity or orthogonal variables (**A:** F0, **B:** location, **C:** level and **D:** voicing). Units are shown  
236 separately by classification as informative about vowel identity and orthogonal values (Dual feature  
237 units), or only vowel identity or orthogonal values (Single feature units). Grey bars represent the  
238 duration of each vowel token. **(E)** CDFs for decoding vowel identity across each orthogonal variable.  
239 **(F)** CDFs for decoding orthogonal values across vowels. Asterisks show significant differences  
240 between vowel and orthogonal (A-D, rank-sum or sign-rank depending on pairing,  $p < 0.05$ ) or across  
241 orthogonal variables (Kruskal-Wallis,  $p < 0.05$ ).

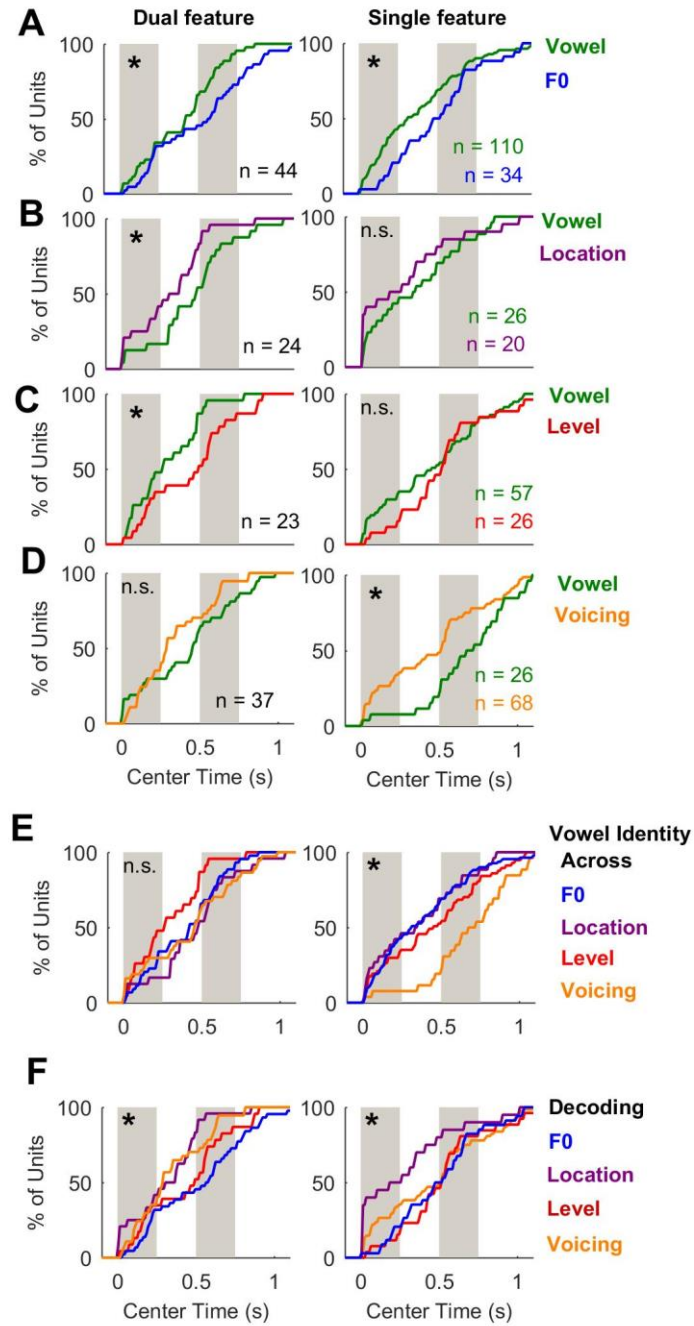

## 243 **Population decoding matches behavioral performance**

244 Our results show a tolerant representation of vowel identity in auditory cortex during  
245 perceptual constancy; however we also wanted to understand how neural encoding was related to  
246 behavior. To match the subject's behavioral performance, decoding performance must reach 100%  
247 as we only decoded neural responses on correct trials. While few individual units reached this level,  
248 it was possible to decode sound features with 100% performance from small populations of units  
249 (Fig 4A). Population decoding summed the number of individual units estimating each value of a  
250 stimulus feature (e.g. vowel /u/ or /ε/) with a weighting based on the relative spike-distance  
251 between decoding templates and test trials (see Methods). Decoding improved with population size,  
252 following a logistic function (Fig 4B,  $p < 0.001$ ) that allowed us to find the minimum number of units  
253 required reach 100% performance and compare decoding across conditions (logistic regression,  
254 analysis of deviance on main effect of stimulus feature). To equate the number of stimulus features  
255 decoded ( $n=2$ ), we compared decoding across vowel, location and voicing (voiced and whispered)  
256 with the F0s (149 and 459 Hz) and sound levels (45 and 75 dB SPL) of greatest separation.

257 Population decoding required fewer units to perfectly reconstruct vowel identity across the  
258 orthogonal dimensions across which animals also showed perceptual constancy: To reach 100%  
259 performance across F0 required 15 units, and across sound location required 14 units whereas  
260 across sound level required 23 units and across voicing required 24 units (Fig 4B; see also Fig S3).  
261 Comparison of population growth curves confirmed that the growth of performance with population  
262 size was significantly different across the orthogonal dimensions across which vowel identity was  
263 decoded ( $\chi^2 = 315.3$ ,  $p < 0.001$ ). Vowel decoding performance increased significantly faster with  
264 population size than did decoding of F0 ( $\chi^2 = 319.7$ ,  $p < 0.001$ ), or equivalent to the orthogonal  
265 dimension (location,  $\chi^2 = 1.87$ ,  $p = 0.172$ ). Conversely, growth curves for population decoding of  
266 vowel identity rose significantly more slowly than for decoding of orthogonal features that animals'  
267 failed to generalize across (voicing:  $\chi^2 = 174.9$ ,  $p < 0.001$ ) or incompletely generalised (sound level:  $\chi^2$



268 = 40.9,  $p = 1.62 \times 10^{-10}$ ). Population decoding of orthogonal values also differed significantly across  
269 dimensions ( $\chi^2 = 191.5$ ,  $p < 0.001$ ), with 23 units required to decode F0 with 100% performance, 13  
270 units for sound location, 20 units for sound level with 20 units and 15 units for voicing. These  
271 findings, suggest that the dynamics of population decoding reflect the ability of animals to  
272 generalise: a hallmark of perceptual constancy across a given dimension is that a performance can  
273 be supported by a smaller number of units.

---

274 **Figure 4 Population decoding can match behavioral performance**

275 **(A)** Schematic illustration of population decoder in which individual unit estimates of acoustic  
276 features (e.g. vowel identity) were weighted using a confidence score. Red lines above templates  
277 indicate time window of response considered for each unit. **(B)** Decoding performance obtained with  
278 increasing population sizes for decoding of vowel identity and orthogonal values as sounds varied in  
279 F0, sound location, level or voicing. Data points show mean  $\pm$  s.e.m. performance of individual  
280 populations for each population size. Curves show logistic regression fits with coefficients ( $\beta$ ).  
281 Asterisks show significant differences (analysis of deviance,  $p < 0.001$ ) between vowel and  
282 orthogonal curves (right column) or between orthogonal dimensions (bottom row). Behavioral  
283 performance (grey lines) was 100% when considering only correct trials. **(C)** Number of units  
284 required to decode variables with performance matching animal behavior.

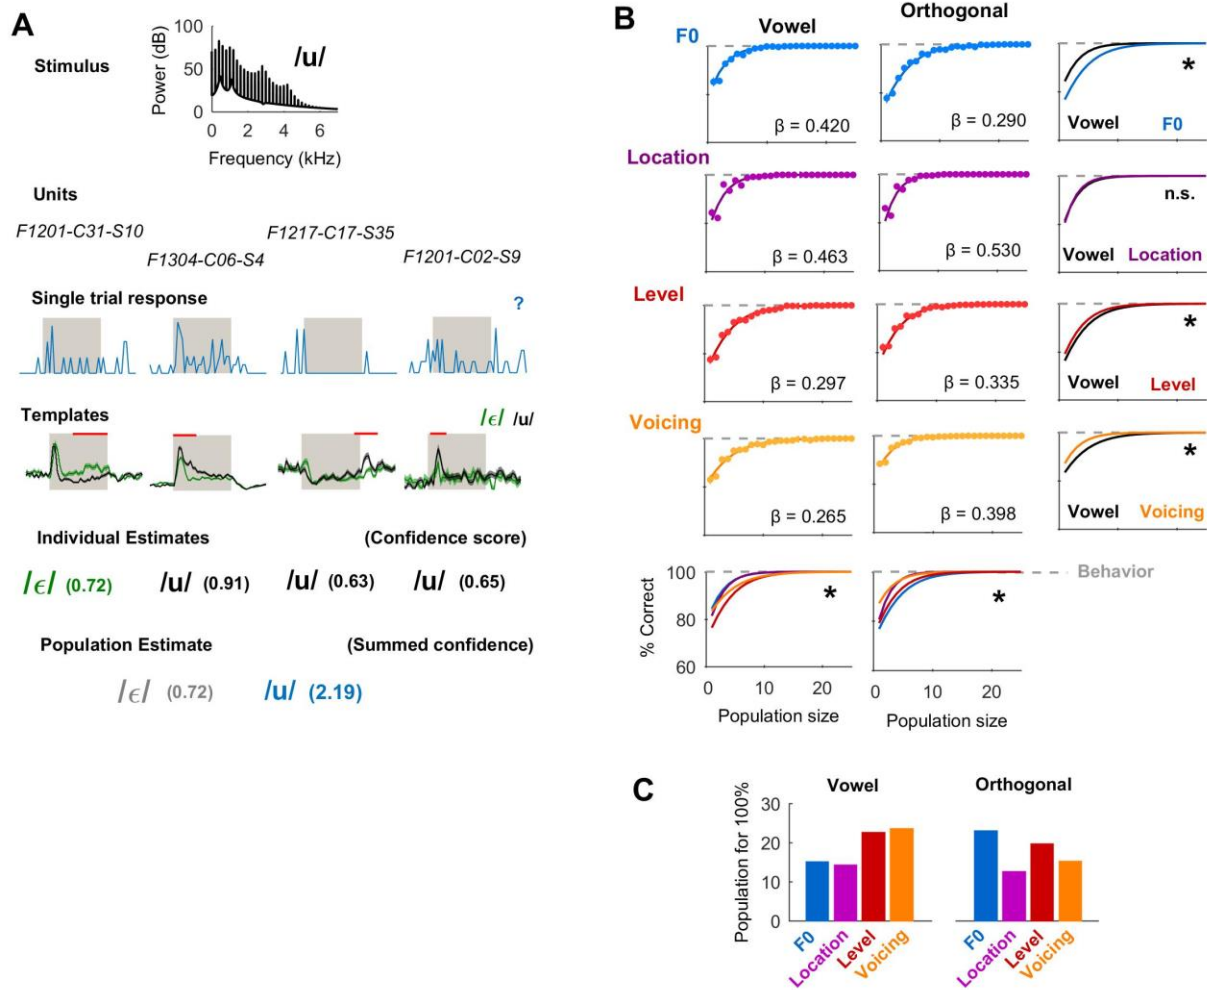

285

## 286 Error trials reveal behavioral role for auditory cortex

287 Population decoding showed that animal's behavioral performance could be matched by  
 288 information sampled in the responses of small groups of neurons. We next asked how auditory  
 289 cortical activity was related to behavior by analysing neural responses on error trials. We reasoned  
 290 that, if activity was relevant for perception, decoding of sound features should be worse when  
 291 animals made mistakes; whereas if activity was purely stimulus-driven and independent of behavior,  
 292 decoding should be similar on correct and error trials, as the same stimuli were presented. Using the  
 293 timing parameters optimized to decode vowel identity on correct trials, we found that, for vowel-  
 294 informative units, decoding performance was significantly worse on error than correct trials (Fig 5A-  
 295 B): this was true for sounds that varied across F0 (Wilcoxon sign-rank:  $z = -8.64$ ,  $p = 5.83 \times 10^{-18}$ ),

296 location ( $z = 3.57, p = 3.61 \times 10^{-4}$ ), sound level ( $z = 6.07, p = 1.30 \times 10^{-9}$ ), voicing ( $z = 5.81, p = 6.16 \times$   
297  $10^{-9}$ ), and when decoding orthogonal values (Fig S6).

298         The decline in decoding performance we observed on error trials could reflect impairment in  
299 the representation of the animals' choice (respond left/right) rather than vowel identity, as choice  
300 and vowel were equivalent on correct trials – as correct trials are defined as those on which a  
301 specific vowel produces a specific response (e.g. always respond left to /ε/). If units were purely  
302 choice-driven, decoding of the animals' behavioral response (left or right) should be similar on error  
303 and correct trials, while decoding of the stimulus should be significantly worse than chance (50%) as  
304 the decoder systematically mis-categorizes trials. While there were many units in which stimulus  
305 decoding was substantially below the 50% point, we also saw significantly worse decoding of choice  
306 on error trials (Fig 5C-D and Fig S7) when sounds varied across F0 ( $z = -10.1, p = 7.50 \times 10^{-24}$ ), location  
307 ( $z = 5.22, p = 1.82 \times 10^{-7}$ ), level ( $z = 6.93, p = 4.19 \times 10^{-12}$ ) and voicing ( $z = 5.25, p = 1.48 \times 10^{-7}$ ).

308         To contrast the influence of sensory and choice information on neural activity, we compared  
309 the error-related decline in decoding of vowel identity and behavioral choice. Decline in decoding  
310 performance was larger for choice than vowel identity when sounds varied across F0 (Fig 5E, rank-  
311 sum test,  $z = 6.54, p = 6.09 \times 10^{-11}$ ), location ( $z = 2.48, p = 0.013$ ) or level ( $z = 4.11, p = 3.89 \times 10^{-5}$ ) but  
312 not voicing ( $z = 0.473, p = 0.636$ ). These findings suggest that, across auditory cortex, neurons  
313 provide a predominantly stimulus based representation whose quality determined the animals'  
314 discrimination ability. However, the presence of units in which choice decoding on error trials was  
315 maintained, and the observation of units in which decoding of the stimulus on error trials was  
316 substantially worse than chance, indicates that the representation is not purely sensory and includes  
317 choice information.

318 **Figure 5 Effects of task accuracy on auditory cortex**

319 **(A)** Discrimination of sound (vowel) identity by individual units on correct and error trials. Bars  
320 represent the duration of the first vowel token after stimulus onset; neural responses shown as  
321 mean  $\pm$  s.e.m. firing rates. **(B)** Performance decoding sound identity on correct and error trials for all  
322 units. Data presented separately for vowels varied across F0, location, sound level and voicing. **(C)**  
323 Discrimination of behavioral choice when animals responded at left or right port by individual units  
324 on correct and error trials. Data is shown as in (A). **(D)** Performance decoding behavioral choice on  
325 correct and error trials for all units. Data shown as in B. **(E)** Comparison of the effects of task  
326 accuracy on decoding sound identity and behavioral choice for vowels varied across each orthogonal  
327 dimension. Asterisks show significant differences between sound and choice.

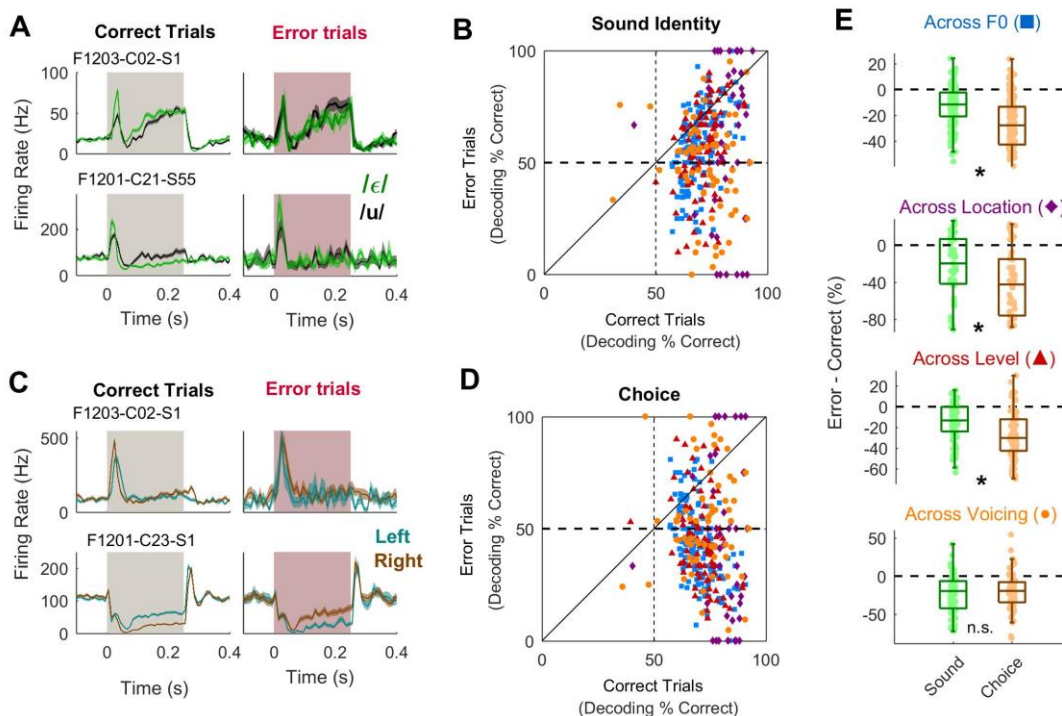

328

329 **Choice and accuracy related activity**

330 Our analysis indicated the encoding of both sensory and behavioral variables during  
331 perceptual constancy. To study this further, we subsampled neural responses to generate matched

332 datasets containing equal numbers of correct and error trials, vowel identities and choice directions  
333 from data across pooled all orthogonal dimensions for which animals showed perceptual constancy  
334 (Fig 6A; See Methods). This allowed us to determine modulation of the neural response by the  
335 stimulus, the behavioral choice and accuracy (which might indicate confidence or inattention as  
336 analysis time windows were restricted to the time before behavioral response). For matched data,  
337 behavioral performance would correspond to 50% correct and modulation by one variable (e.g.  
338 choice) could not be trivially explained by other variables (e.g. accuracy or sound).

339         When decoding neural responses from matched data, we confirmed that while information  
340 about stimulus identity was more widespread than about behavioral variables, units also conveyed  
341 information about choice and accuracy: 37.7% of units (90/239) were significantly informative  
342 (permutation test,  $p < 0.05$ ) about sound identity, 23.4% (56/239) about choice and 22.2% (53/239)  
343 informative about trial accuracy (Fig 6B). Decoding performance was significantly better for vowel  
344 identity than for choice or accuracy (Fig. 6C-D, Kruskal-Wallis test:  $\chi^2 = 17.5$ ,  $p = 1.58 \times 10^{-4}$ ; Tukey-  
345 Kramer corrected pairwise comparisons: vowel vs. choice,  $p = 0.0024$ ; vowel vs. accuracy,  $p = 3.43 \times$   
346  $10^{-4}$ ; choice vs. accuracy,  $p = 0.864$ ). Population decoding plateaued with fewer units when decoding  
347 vowel identity (Fig 6E, 18 units required for 100% correct) than decoding accuracy (21 units) or  
348 choice (25 units) and performance growth curves differed significantly vowel identity and choice  
349 (Bonferroni corrected analysis of deviance,  $\chi^2 = 154.3$ ,  $p < 0.001$ ), and vowel identity and accuracy ( $\chi^2$   
350  $= 109.0$ ,  $p < 0.001$ ). We also compared decoding of choice and accuracy, but found no significant  
351 differences ( $p > 0.05$ ) in decoding performance of individual units (Fig 6D) or population decoding  
352 functions (Fig 6E). Nonetheless, there were clear representations of behavioral, as well as stimulus,  
353 variables, as we could decode the animal's behavioral choice and accuracy better than chance in a  
354 substantial proportion (>20%) of individual units and with perfect decoding performance across  
355 small populations.

356 Our results show that vowel identity was represented across behavioural variables as well as  
357 orthogonal stimulus variations, as units represented vowel identity across the animals' behavioural  
358 responses and performance accuracy. Given that auditory cortex multiplexed sound features, we  
359 asked if sensory and non-sensory variables were also encoded at different times. We found that  
360 information about sound identity emerged earliest, followed by task accuracy and then behavioral  
361 choice (Fig 6F): For 147 units that were informative about sound identity, choice and/or accuracy,  
362 the time of best decoding differed significantly between dimensions (Kruskal-Wallis test,  $\chi^2 = 15.07$ ,  
363  $p = 5.35 \times 10^{-4}$ ) with choice represented later than sound identity (Tukey-Kramer corrected,  $p = 3.07$   
364  $\times 10^{-4}$ ) but timing of information about accuracy not significantly different from either variable ( $p >$   
365  $0.1$ ). Thus units multiplexed behavioral, as well as sensory variables, with a sequence consistent with  
366 sensory-motor transformation, and provided a tolerant representation of sound identity across  
367 orthogonal behavioral, as well as acoustic dimensions.

---

368 **Figure 6 Auditory cortical neurons encode sound identity, behavioral choice and task accuracy**

369 **(A)** Analysis design for matching equal numbers of neural responses to each sound identity, left and  
370 right choices, and correct and error trials. Data shown as raster plots of spike times on each trial for  
371 one unit and PSTHs representing mean  $\pm$  s.e.m. firing rate across trials for three units. Grey bars  
372 show the first stimulus token. Trial contingency (i.e. respond left for /ε/) shown as an example on  
373 which one ferret was trained (F1217). **(B)** Percentage of units informative about sound, choice  
374 and/or accuracy in matched data. **(C)** Performance decoding sound, choice and accuracy across all  
375 units. **(D)** Comparison of performance decoding sound identity, behavioral choice and task accuracy;  
376 boxplots show mean and interquartile range. Lines show significant pairwise comparisons ( $p < 0.01$ ).  
377 **(E)** Performance decoding sound, choice or accuracy with populations of units. Data points show  
378 mean  $\pm$  s.e.m. population performance for each population size. **(G)** Cumulative distributions  
379 showing center times for best performance when decoding vowel identity behavioral choice and  
380 task accuracy. Grey bars represent the duration of the each token within the stimulus. Data shown

381 for all units informative about one or more variables; asterisk reflects significant difference between  
 382 variables ( $p < 0.001$ ).

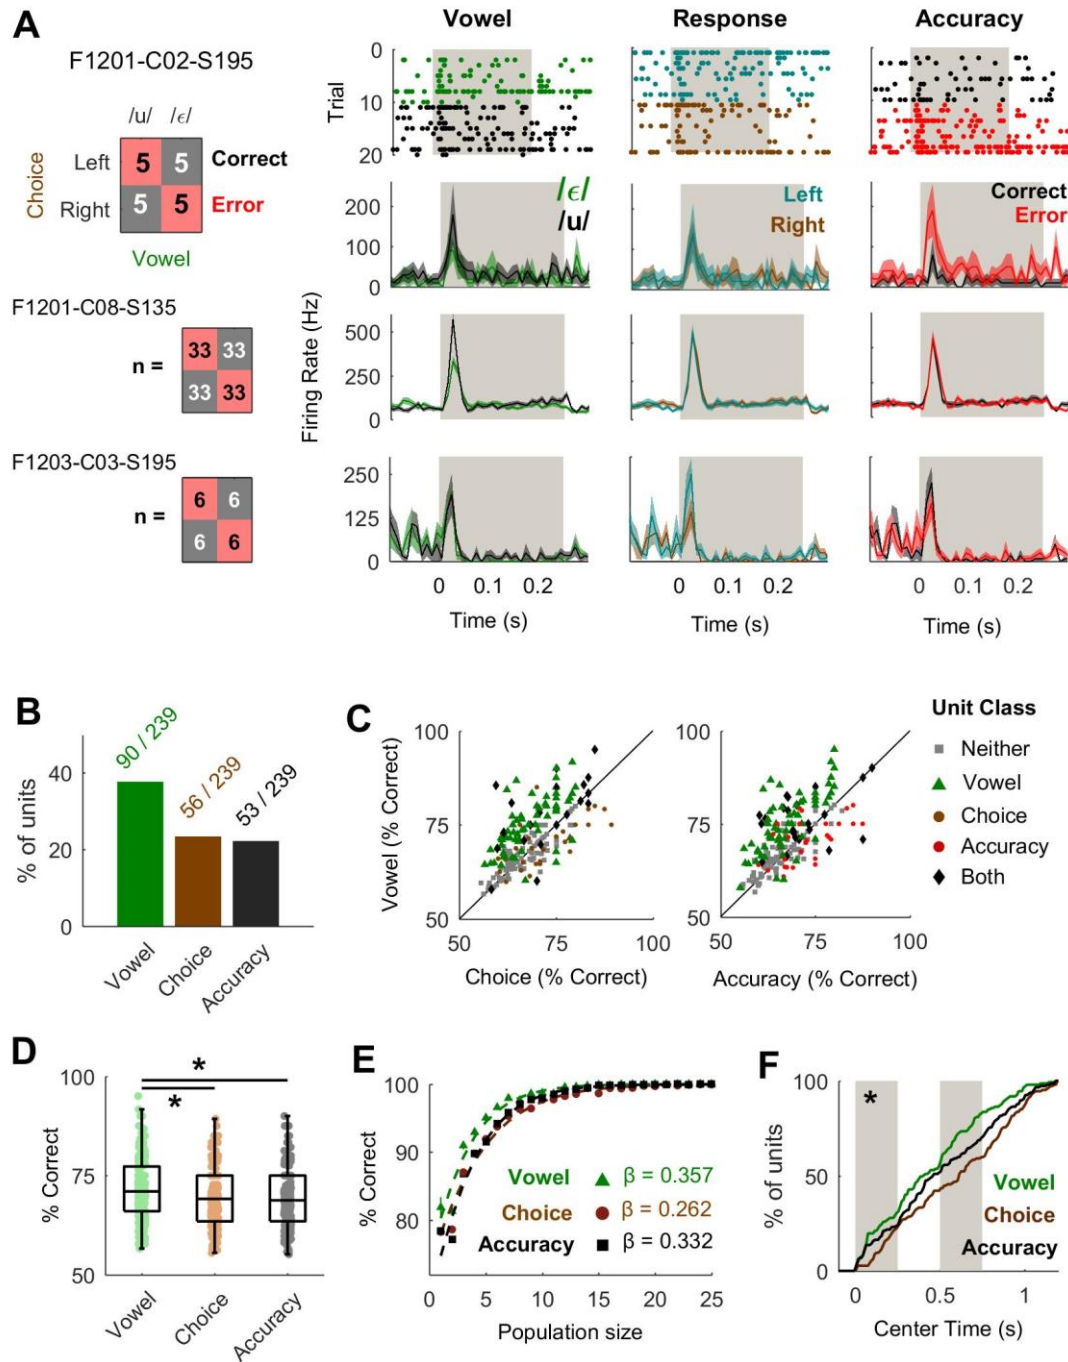

383

## 384 **Effects of Task Engagement**

385           The encoding of animal's choice and accuracy illustrates that auditory cortex processing  
386 extends beyond the representation of acoustic input. Attentional state influences auditory cortical  
387 activity (Dong et al., 2013; Kuchibhotla et al., 2017; Otazu et al., 2009) and receptive field properties  
388 (Atiani et al., 2014; David et al., 2012; Fritz et al., 2003; Jaramillo and Zador, 2011; Lee and  
389 Middlebrooks, 2011; Lu et al., 2017; Niwa et al., 2012) . We therefore asked if neural tolerance only  
390 emerged during task engagement, by comparing unit responses (e.g. Fig S8) recorded during task  
391 performance and during passive listening.

392           We observed that task engagement suppressed spiking responses in the first 100 ms after  
393 stimulus onset (Fig 7A, sign-rank test,  $z = 3.62$ ,  $p = 2.93 \times 10^{-4}$ ). In the same time window, we  
394 decoded vowel identity significantly better from units recorded task-engaged than passively listening  
395 animals (Fig 7B,  $z = -2.83$ ,  $p = 0.0047$ ). We then expanded our analysis in time to consider effects of  
396 engagement with a sliding window, finding that changes in spiking activity and decoding  
397 performance were strongly time-dependent: Engagement-related suppression of firing rates  
398 occurred throughout stimulus presentation, and contrasted with sustained enhancement of activity  
399 in the anticipatory period before stimulus onset (Fig 7C). Furthermore, the *difference in firing rate*  
400 between passive and task-engaged units differed significantly with time (one-way anova,  $F_{30, 4743} =$   
401  $7.08$ ,  $p = 1.38 \times 10^{-28}$ ). Engagement-related enhancement of vowel decoding was observed at the  
402 onset and offset of sounds but not in the sustained period of sound presentation (Fig 7D) and the  
403 effect of task-engagement varied significantly with time ( $F_{30, 4650} = 1.57$ ,  $p = 0.0247$ ).

404           To understand how the time-dependent effects of task-engagement modulated overall  
405 information content, we compared spiking and vowel decoding in the time window that gave best  
406 decoding performance, optimised for each condition independently. Consistent with fixed window  
407 analyses, firing rates in optimized windows were lower in the engaged than passive condition (Fig  
408 7E; Wilcoxon sign-rank test:  $z = 3.20$ ,  $p = 0.0014$ ). However, in contrast to findings with fixed time



409 windows, engagement did not improve optimal decoding performance: for units that were  
410 significantly vowel informative during active listening, decoding performance was statistically  
411 indistinguishable ( $z = -0.55$ ,  $p = 0.582$ , note firing rate difference was still significant for these units,  $z$   
412  $= 2.41$ ,  $p = 0.016$ ) while if all units were considered, there was a small but significant drop in  
413 performance (Fig 7F;  $z = 2.15$ ,  $p = 0.032$ ). Task engagement similarly affected representation of F0,  
414 by suppressing spiking activity ( $z = 2.98$ ,  $p = 0.003$ ) and decoding performance ( $z = 4.45$ ,  $p = 8.47 \times 10^{-6}$ )  
415 in optimized time windows (Fig S9).

416 To understand the origin of differences in fixed-window and optimised analyses, we  
417 compared the timing parameters that gave best performance decoding vowel identity, with a focus  
418 on units that were significantly vowel informative during task performance. This revealed that the  
419 optimized time window for vowel-informative units was significantly earlier during task performance  
420 than passive listening (sign-rank test on center time:  $z = 2.79$ ,  $p = 0.015$ ). The effects of task-  
421 engagement were therefore not to enhance the degree of tolerance of vowel informative units, as  
422 judged by optimized decoding of vowel identity across F0, which remained similar across states, but  
423 rather to enhance the speed and efficiency of tolerant representations, encoding vowel identity  
424 faster and using fewer spikes.

425 **Figure 7 Modulation of auditory processing by task engagement**

426 **(A)** Paired comparison of mean firing rate in the 100 ms after stimulus presentation for units ( $n =$   
427 154) recorded during task performance (engaged) and passive listening conditions. Data points show  
428 individual units labelled by classification as informative about vowel identity in engaged and passive  
429 conditions. **(B)** Paired comparison of performance decoding vowel identity using neural responses  
430 measured in the 100 ms after stimulus onset. Individual data points shown each unit ( $n = 151$ ). Data  
431 is shown as in (A). **(C-D)** Paired comparison of firing rate (C) and vowel decoding performance (D) in  
432 time windows fixed relative to stimulus onset. Data points show mean  $\pm$  s.e.m. Black triangles  
433 indicate the comparison at 0 – 100 ms in A-B. **(E)** Firing rate in the time window that gave best  
434 performance decoding vowel identity (optimized independently for each unit in each experimental  
435 condition [passive/ engaged]). Data is shown as in (A). **(F)** Paired comparison of best performance  
436 decoding vowel identity in optimized time windows. Data is shown as in (A). **(G)** Cumulative density  
437 distributions showing center times giving best decoding performance. Data is shown for units  
438 informative about vowel identity during task performance.

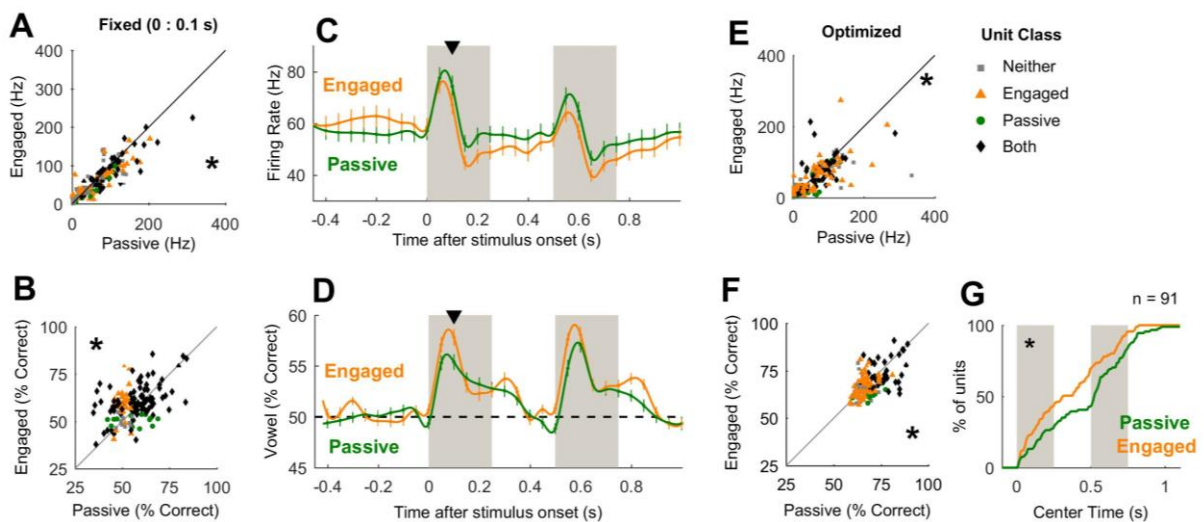

439

## 440 **Effects of Training**

441 In addition to task engagement, long-term experience can also affect auditory cortical  
442 processing (Bao et al., 2004; Ohl et al., 2001; Polley et al., 2004; Polley et al., 2006; Schnupp et al.,  
443 2006; Whitton et al., 2014)(Atilgan et al. Unpublished) and so we also asked if training to  
444 discriminate vowels altered auditory representations. We recorded sound-evoked responses (Fig.  
445 S8) to vowels in four naïve ferrets (86 units), and in two trained animals presented with untrained  
446 vowels (56 units) and compared these with units recorded in trained animals responding to trained  
447 vowels (230 units). As we could not pair units across trained and naïve animals, we conducted  
448 unpaired comparisons of neural activity (normalized relative to a pre-stimulus baseline period) and  
449 decoding performance.

450 Training suppressed neural activity in both comparisons of unit responses to trained and  
451 untrained stimuli (Fig 8A) and comparisons of units from trained and naïve animals (Fig 8B): Using a  
452 roving analysis window and ANOVA to compare normalized firing rates, with time bin and stimulus  
453 training as factors, we found significant effects of time ( $F_{30, 8804} = 29.0, p < 0.001$ ), training ( $F_{1, 8804} =$   
454  $24.1, p < 0.001$ ), and a time x training interaction ( $F_{30, 8804} = 1.89, p = 0.0024$ ). When comparing firing  
455 rates in units recorded from trained and naïve subjects, we also found significant effects of time ( $F_{30,$   
456  $9734} = 51.3, p < 0.001$ ), training ( $F_{1, 9734} = 25.3, p < 0.001$ ), and a time x training interaction ( $F_{30, 9734} =$   
457  $3.83, p < 0.001$ ).

458 Training also reduced performance decoding vowel identity across F0 in both comparisons of  
459 unit responses to trained and untrained stimuli (Fig 8C), and of units recorded in trained and naïve  
460 animals (Fig 8D): Comparisons across time (two-way ANOVA) showed significant effects of stimulus  
461 training ( $F_{1, 8804} = 7.69, p = 0.006$ ), time ( $F_{30, 8804} = 13.6, p < 0.001$ ), and a significant time x training  
462 interaction ( $F_{30, 8804} = 1.65, p = 0.014$ ). Similarly, subject training ( $F_{1, 9734} = 12.4, p < 0.001$ ) and time  
463 ( $F_{30, 9734} = 16.3, p < 0.001$ ) significantly affected vowel decoding – although we found no significant

464 interaction ( $F_{30, 9734} = 0.73, p = 0.857$ ). Thus when assessing the effects of training by comparison of  
465 stimuli or subjects, neural activity and vowel decoding performance was suppressed.

466 Training-related suppression of vowel decoding was also observed when the time  
467 parameters of decoding were optimized for each unit (Fig. 8E): Comparing decoding performance  
468 across all units recorded in passive conditions revealed a significant effect of experimental group  
469 (Kruskal-Wallis test,  $\chi^2 = 12.08, p = 0.002$ ), with pairwise comparisons revealing significant  
470 differences between decoding of responses to trained and untrained sounds (Tukey-Kramer  
471 corrected,  $p = 0.046$ ), and between units in trained and naïve animals responding to the same  
472 physical stimuli ( $p = 0.007$ ) but not between units in trained and naïve animals responding to  
473 unfamiliar sounds ( $p = 0.987$ ). In contrast to fixed time window analysis however, we saw no  
474 significant effects of training on firing rates in optimized time windows (Fig 8F,  $p > 0.1$ ). Thus both  
475 fixed-window and optimized decoding show training-related reduction in information about vowel  
476 identity across F0. Similar results were also found for decoding of F0 across vowels (Fig S10),  
477 suggesting that training has broad effects on auditory processing and that information about sound  
478 features was, paradoxically, more robust in naïve than trained animals.

479

---

480 **Figure 8 Modulation of auditory processing by training**

481 **(A-B)** Firing rates of units evoked by trained and untrained sounds (A) and in units recorded from  
482 trained and naïve animals (B). Data is shown as mean  $\pm$  s.e.m. in 100 ms windows at 50 ms intervals  
483 with spline interpolation across means. **(C-D)** Unpaired comparison of performance decoding vowel  
484 identity from unit responses to trained and untrained sounds (C) and units recorded in trained and  
485 naïve animals (D). Data is shown as in A-B. **(E)** Comparison of best performance decoding vowel  
486 identity in optimized time window. Individual data points show individual units; box plots show  
487 median and inter-quartile ranges. Asterisks show significant comparisons between experimental

488 groups (Tukey correction for multiple comparisons,  $p < 0.05$ ). Effect of task engagement shown for  
489 reference. (F) Normalized firing rate in the time window giving best performance decoding vowel  
490 identity. Data is shown as in F.

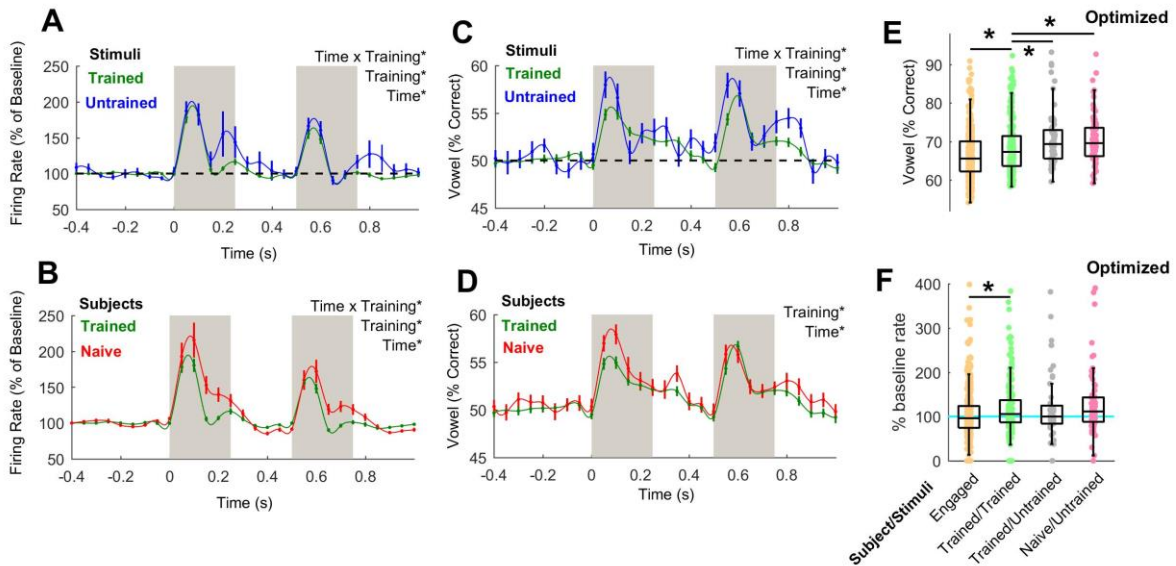

491

## 492 **Discussion**

493           Here we demonstrate that auditory cortical neurons reliably represent vowel sounds across  
494 a range of orthogonal acoustic transformations that mirror those preserved in perceptual constancy.  
495 The neural representation provided by auditory cortex was multivariate, as units represented  
496 multiple stimulus features, and multiplexed, as variables were best represented at different times.  
497 Multivariate encoding extended to behavioral dimensions as units represented subjects' choice and  
498 accuracy and decoding performance differed between correct and error trials. Consistent with a shift  
499 from stimulus-related to task-related neural representation, we found that both task-engagement  
500 and long-term training significantly affected the representation of vowel identity in auditory cortex.  
501 Together our findings demonstrate that auditory cortical neurons provide a degree of tolerance  
502 across variation in sensory input and behavior that was sufficient to represent the identity of target  
503 sounds during perceptual constancy.

504           Ferrets identified vowels by their spectral timbre while sounds varied across the major  
505 acoustic dimensions key to real-world hearing, including F0 that determines voice pitch, sound  
506 location and sound level. Both animals and neurons generalized across the same acoustic  
507 dimensions (F0, space etc.). Encoding of multiple features of speech-like sounds, sometimes by the  
508 same units, supports previous reports of distributed coding in auditory cortex (Bizley et al., 2009;  
509 Griffiths et al., 2010; Ortiz-Rios et al., 2017) and shows that even when potentially disruptive to  
510 behavior, orthogonal variables (e.g. F0) are encoded. Furthermore, the encoding of vowel identity by  
511 even small populations of units was sufficient to account for, or exceed, animal's behavioral  
512 performance. This suggests that auditory cortex provides a multivariate representation of sounds  
513 from which downstream neurons may select behaviorally relevant dimensions during perceptual  
514 constancy.

515           The point at which multivariate encoding of stimulus features might transition to a  
516 univariate representation of a task-relevant dimension is unclear. Here we recorded from a

517 combination of primary and secondary tonotopic areas of auditory cortex; however the limited  
518 density of electrodes in our recording array prevented us from mapping the precise boundaries  
519 between regions necessary to determine if neural tolerance differed between fields as suggested  
520 elsewhere (Carruthers et al., 2015). In future it will be important to record using denser arrays with  
521 which tolerant representations can be mapped across auditory cortex and beyond: Neurons in  
522 prefrontal cortex (PFC) and higher-order auditory cortex (dPEG) are selective for behaviorally  
523 relevant sounds (Atiani et al., 2014; Ding and Simon, 2012; Fritz et al., 2010; Russ et al., 2008;  
524 Tsunada et al., 2016) and so we might expect that in such areas, tolerant representations of sound  
525 identity are preserved while encoding of orthogonal task-irrelevant dimensions is lost.

526         We decoded vowel identity and orthogonal variables independently and without *a priori*  
527 selection of neural response time windows. This approach showed that responses of units  
528 informative about both vowel identity and orthogonal features were best decoded in distinct time  
529 windows. Temporal multiplexing by units mirrored the time-course of sound perception: Decoding  
530 of vowel identity and sound location earlier than voicing or F0 is consistent with perception of sound  
531 location and vowel identity at sound onset (Litovsky et al., 1999; Stecker and Hafter, 2002), while  
532 listeners require longer to estimate F0 (Gray, 1942; Mckeown and Patterson, 1995; Walker et al.,  
533 2011). Best decoding of sound level after vowel identity, sound location or voicing may reflect the  
534 time course of temporal integration by the auditory system when assessing moderate level sounds  
535 (Buus et al., 1997; Glasberg and Moore, 2002). However, information about voicing was decoded  
536 earlier than other stimulus attributes, suggesting that information about harmonicity is available  
537 earlier in the neural response, and that temporal multiplexing occurs even when perceptual  
538 constancy does not.

539         The order in which acoustic feature representations emerged during perceptual constancy  
540 also matched the encoding of vowel identity, F0 and location under anaesthesia (Walker et al.,  
541 2011), indicating that multiplexing is a general principle of encoding in auditory cortex. Our work

542 extends these findings to additional acoustic features (voicing and sound level) as well as non-  
543 sensory variables (choice and accuracy). Furthermore, our comparison of engaged and passively  
544 listening conditions showed that the time-course of multiplexing was plastic and depended on  
545 behavioral state. By accelerating the encoding of acoustic variables during task performance,  
546 neurons may create time for integration of motor and motivational signals, as well as taught  
547 associations (Fritz et al., 2003; Fritz et al., 2010; McGinley et al., 2015; Schneider et al., 2014) in  
548 order to coordinate behavioral responses. We would therefore predict that delaying the encoding of  
549 acoustic features, but preserving the overall information content of auditory cortical responses,  
550 would either disrupt or retard sound discrimination.

551         An open question is why training animals to discriminate sounds reduced information about  
552 stimulus features. Such effects are consistent with independent findings that training animals to  
553 discriminate vowel identity leads to a reduction in the variation in auditory cortical responses  
554 attributable to vowel identity and F0 (Atilgan et al., Unpublished). Furthermore, changes in decoding  
555 performance could not be explained trivially by changes in firing rate, as we observed both  
556 suppression of neural activity and enhancement of decoding performance (Fig 7), and suppression of  
557 decoding performance in the absence of changes in neural activity (Fig 8). One possibility could be  
558 that responses to untrained sounds reflect purely feedforward information about sound features  
559 extracted earlier in the auditory pathway, but that the association of sounds with non-sensory  
560 dimensions in auditory cortex comes at the cost of representing acoustic information.

561         Our findings confirm the importance of behavioral variables in auditory cortical processing  
562 (Bizley et al., 2013b; Dong et al., 2013; Niwa et al., 2012): decoding of sound features was impaired  
563 on error trials, and we found many units that encoded information about the animals' choice and /or  
564 accuracy. The significant drop in decoding performance on error trials, and the sensitivity of units to  
565 accuracy, shows that auditory cortical activity is predictive of upcoming mistakes. Given this  
566 information, and the finding that stimulus identity could be decoded perfectly from small



567 populations of units, why do animals make errors? One possibility is that errors arise from  
568 inattention, which has a distinct neural signature (Lakatos et al., 2016) that our decoder uses to  
569 distinguish correct and error trials. At present it is unclear whether the accuracy signal we decode  
570 reflects such an attentional lapse or arises as an interaction between representations of sound  
571 identity and behavioral choice, or a representation of confidence in auditory processing, or  
572 anticipation of reward (Metzger et al., 2006). Future experiments in which confidence or reward  
573 value are systematically explored may explain the precise nature of accuracy information reported  
574 here.

575         In summary, our results show that during perceptual constancy, neurons in auditory cortex  
576 provide tolerant representations of vowel identity and that small populations of units can represent  
577 sounds as well as, or better than animal's behavior. Auditory cortical units also encoded information  
578 about F0, sound location, level and voicing, as well as the animal's choice and accuracy in the task,  
579 each with a specific temporal profile that shows a multivariate and multiplexed system. Task-  
580 engagement and training modulated auditory processing, demonstrating a role for attention and  
581 long-term experience in perceptual constancy. Across all these variables and experimental  
582 conditions, auditory cortical responses showed sufficient tolerance to unambiguously represent  
583 vowel identity in the same conditions that animals successfully generalized behavioral performance,  
584 and thus provided a neural correlate of perceptual constancy.

### 585 **Author contributions:**

586 SMT and JKB designed the experiments and wrote the paper; all authors were involved in data  
587 collection; SMT analysed the data.

### 588 **Acknowledgements**

589 This work was funded by a Royal Society Dorothy Hodgkin Fellowship to JKB, the BBSRC  
590 (BB/H016813/1) and the Wellcome Trust / Royal Society (WT098418MA).

## 591 **References**

- 592 Atiani, S., David, S.V., Elgueda, D., Locastro, M., Radtke-Schuller, S., Shamma, S.A., and Fritz, J.B.  
593 (2014). Emergent selectivity for task-relevant stimuli in higher-order auditory cortex. *Neuron* 82,  
594 486-499.
- 595 Bao, S., Chang, E.F., Woods, J., and Merzenich, M.M. (2004). Temporal plasticity in the primary  
596 auditory cortex induced by operant perceptual learning. *Nat Neurosci* 7, 974-981.
- 597 Bendor, D., and Wang, X.Q. (2007). Differential neural coding of acoustic flutter within primate  
598 auditory cortex. *Nat Neurosci* 10, 763-771.
- 599 Billimoria, C.P., Kraus, B.J., Narayan, R., Maddox, R.K., and Sen, K. (2008). Invariance and sensitivity  
600 to intensity in neural discrimination of natural sounds. *Journal of Neuroscience* 28, 6304-6308.
- 601 Bizley, J.K., and Cohen, Y.E. (2013). The what, where and how of auditory-object perception. *Nat Rev*  
602 *Neurosci* 14, 693-707.
- 603 Bizley, J.K., Nodal, F.R., Nelken, I., and King, A.J. (2005). Functional organization of ferret auditory  
604 cortex. *Cerebral cortex* 15, 1637-1653.
- 605 Bizley, J.K., Walker, K.M., King, A.J., and Schnupp, J.W. (2013a). Spectral timbre perception in ferrets:  
606 discrimination of artificial vowels under different listening conditions. *J Acoust Soc Am* 133, 365-376.
- 607 Bizley, J.K., Walker, K.M., Nodal, F.R., King, A.J., and Schnupp, J.W. (2013b). Auditory cortex  
608 represents both pitch judgements and the corresponding acoustic cues. *Current Biology* 23, 620-625.
- 609 Bizley, J.K., Walker, K.M., Nodal, F.R., King, A.J., and Schnupp, J.W. (2013c). Auditory cortex  
610 represents both pitch judgments and the corresponding acoustic cues. *Curr Biol* 23, 620-625.
- 611 Bizley, J.K., Walker, K.M., Silverman, B.W., King, A.J., and Schnupp, J.W. (2009). Interdependent  
612 encoding of pitch, timbre, and spatial location in auditory cortex. *J Neurosci* 29, 2064-2075.
- 613 Bregman, A.S. (1990). *Auditory scene analysis* (Cambridge, MA: MIT Press).
- 614 Buus, S., Florentine, M., and Poulsen, T. (1997). Temporal integration of loudness, loudness  
615 discrimination, and the form of the loudness function. *J Acoust Soc Am* 101, 669-680.

616 Carruthers, I.M., Laplagne, D.A., Jaegle, A., Briguglio, J.J., Mwilambwe-Tshilobo, L., Natan, R.G., and  
617 Geffen, M.N. (2015). Emergence of invariant representation of vocalizations in the auditory cortex. *J*  
618 *Neurophysiol* 114, 2726-2740.

619 David, S.V., Fritz, J.B., and Shamma, S.A. (2012). Task reward structure shapes rapid receptive field  
620 plasticity in auditory cortex. *Proc Natl Acad Sci U S A* 109, 2144-2149.

621 DiCarlo, J.J., and Cox, D.D. (2007). Untangling invariant object recognition. *Trends Cogn Sci* 11, 333-  
622 341.

623 DiCarlo, J.J., Zoccolan, D., and Rust, N.C. (2012). How does the brain solve visual object recognition?  
624 *Neuron* 73, 415-434.

625 Ding, N., and Simon, J.Z. (2012). Emergence of neural encoding of auditory objects while listening to  
626 competing speakers. *Proceedings of the National Academy of Sciences of the United States of*  
627 *America* 109, 11854-11859.

628 Dong, C., Qin, L., Zhao, Z., Zhong, R., and Sato, Y. (2013). Behavioral modulation of neural encoding  
629 of click-trains in the primary and nonprimary auditory cortex of cats. *J Neurosci* 33, 13126-13137.

630 Foffani, G., and Moxon, K.A. (2004). PSTH-based classification of sensory stimuli using ensembles of  
631 single neurons. *J Neurosci Methods* 135, 107-120.

632 Fritz, J., Shamma, S., Elhilali, M., and Klein, D. (2003). Rapid task-related plasticity of spectrotemporal  
633 receptive fields in primary auditory cortex. *Nat Neurosci* 6, 1216-1223.

634 Fritz, J.B., David, S.V., Radtke-Schuller, S., Yin, P., and Shamma, S.A. (2010). Adaptive, behaviorally  
635 gated, persistent encoding of task-relevant auditory information in ferret frontal cortex. *Nat*  
636 *Neurosci* 13, 1011-1019.

637 Ghazanfar, A.A., Turesson, H.K., Maier, J.X., van Dinther, R., Patterson, R.D., and Logothetis, N.K.  
638 (2007). Vocal tract resonances as indexical cues in rhesus monkeys. *Current Biology* 17, 425-430.

639 Glasberg, B.R., and Moore, B.C.J. (2002). A model of loudness applicable to time-varying sounds. *J*  
640 *Audio Eng Soc* 50, 331-342.

641 Gray, G.W. (1942). Phonemic Microtomy: The Minimum Duration of Perceptible Speech Sounds.  
642 Speech Monogr 9, 75-90.

643 Griffiths, T.D., Kumar, S., Sedley, W., Nourski, K.V., Kawasaki, H., Oya, H., Patterson, R.D., Brugge,  
644 J.F., and Howard, M.A. (2010). Direct recordings of pitch responses from human auditory cortex.  
645 Current biology : CB 20, 1128-1132.

646 Griffiths, T.D., Warren, J.D., Scott, S.K., Nelken, I., and King, A.J. (2004). Cortical processing of  
647 complex sound: a way forward? Trends Neurosci 27, 181-185.

648 Hine, J.E., Martin, R.L., and Moore, D.R. (1994). Free-field binaural unmasking in ferrets. Behavioral  
649 neuroscience 108, 196-205.

650 Honorof, D.N., and Whalen, D.H. (2010). Identification of speaker sex from one vowel across a range  
651 of fundamental frequencies. J Acoust Soc Am 128, 3095-3104.

652 Jaramillo, S., and Zador, A.M. (2011). The auditory cortex mediates the perceptual effects of acoustic  
653 temporal expectation. Nat Neurosci 14, 246-251.

654 Kojima, S., and Kiritani, S. (1989). Vocal-Auditory Functions in the Chimpanzee - Vowel Perception.  
655 Int J Primatol 10, 199-213.

656 Kuchibhotla, K.V., Gill, J.V., Lindsay, G.W., Papadoyannis, E.S., Field, R.E., Sten, T.A., Miller, K.D., and  
657 Froemke, R.C. (2017). Parallel processing by cortical inhibition enables context-dependent behavior.  
658 Nat Neurosci 20, 62-71.

659 Lakatos, P., Barczak, A., Neymotin, S.A., McGinnis, T., Ross, D., Javitt, D.C., and O'Connell, M.N.  
660 (2016). Global dynamics of selective attention and its lapses in primary auditory cortex. Nat Neurosci  
661 19, 1707-1717.

662 Lee, C.C., and Middlebrooks, J.C. (2011). Auditory cortex spatial sensitivity sharpens during task  
663 performance. Nat Neurosci 14, 108-114.

664 Litovsky, R.Y., Colburn, H.S., Yost, W.A., and Guzman, S.J. (1999). The precedence effect. Journal of  
665 the Acoustical Society of America 106, 1633-1654.

666 Logothetis, N.K., and Sheinberg, D.L. (1996). Visual object recognition. *Annu Rev Neurosci* 19, 577-  
667 621.

668 Lu, K., Xu, Y., Yin, P., Oxenham, A.J., Fritz, J.B., and Shamma, S.A. (2017). Temporal coherence  
669 structure rapidly shapes neuronal interactions. *Nat Commun* 8, 13900.

670 McGinley, M.J., David, S.V., and McCormick, D.A. (2015). Cortical Membrane Potential Signature of  
671 Optimal States for Sensory Signal Detection. *Neuron* 87, 179-192.

672 Mckeown, J.D., and Patterson, R.D. (1995). The Time-Course of Auditory Segregation - Concurrent  
673 Vowels That Vary in Duration. *Journal of the Acoustical Society of America* 98, 1866-1877.

674 Meliza, C.D., and Margoliash, D. (2012). Emergence of Selectivity and Tolerance in the Avian  
675 Auditory Cortex. *Journal of Neuroscience* 32, 15158-15168.

676 Metzger, R.R., Greene, N.T., Porter, K.K., and Groh, J.M. (2006). Effects of reward and behavioral  
677 context on neural activity in the primate inferior colliculus. *J Neurosci* 26, 7468-7476.

678 Musial, P.G., Baker, S.N., Gerstein, G.L., King, E.A., and Keating, J.G. (2002). Signal-to-noise ratio  
679 improvement in multiple electrode recording. *J Neurosci Methods* 115, 29-43.

680 Niwa, M., Johnson, J.S., O'Connor, K.N., and Sutter, M.L. (2012). Activity related to perceptual  
681 judgment and action in primary auditory cortex. *J Neurosci* 32, 3193-3210.

682 Ohl, F.W., Scheich, H., and Freeman, W.J. (2001). Change in pattern of ongoing cortical activity with  
683 auditory category learning. *Nature* 412, 733-736.

684 Ohms, V.R., Gill, A., Van Heijningen, C.A.A., Beckers, G.J.L., and ten Cate, C. (2010). Zebra finches  
685 exhibit speaker-independent phonetic perception of human speech. *P R Soc B* 277, 1003-1009.

686 Ortiz-Rios, M., Azevedo, F.A., Kusmierek, P., Balla, D.Z., Munk, M.H., Keliris, G.A., Logothetis, N.K.,  
687 and Rauschecker, J.P. (2017). Widespread and Opponent fMRI Signals Represent Sound Location in  
688 Macaque Auditory Cortex. *Neuron* 93, 971-983 e974.

689 Osmanski, M.S., and Wang, X. (2015). Behavioral dependence of auditory cortical responses. *Brain*  
690 *Topogr* 28, 365-378.

691 Otazu, G.H., Tai, L.H., Yang, Y., and Zador, A.M. (2009). Engaging in an auditory task suppresses  
692 responses in auditory cortex. *Nat Neurosci* 12, 646-654.

693 Peterson, G.E., and Barney, H.L. (1952). Control methods used in a study of vowels. *J Acoust Soc Am*  
694 24, 175-184.

695 Polley, D.B., Heiser, M.A., Blake, D.T., Schreiner, C.E., and Merzenich, M.M. (2004). Associative  
696 learning shapes the neural code for stimulus magnitude in primary auditory cortex. *Proc Natl Acad*  
697 *Sci U S A* 101, 16351-16356.

698 Polley, D.B., Steinberg, E.E., and Merzenich, M.M. (2006). Perceptual learning directs auditory  
699 cortical map reorganization through top-down influences. *J Neurosci* 26, 4970-4982.

700 Russ, B.E., Orr, L.E., and Cohen, Y.E. (2008). Prefrontal neurons predict choices during an auditory  
701 same-different task. *Current biology : CB* 18, 1483-1488.

702 Sadagopan, S., and Wang, X. (2008). Level invariant representation of sounds by populations of  
703 neurons in primary auditory cortex. *Journal of Neuroscience* 28, 3415-3426.

704 Schebesch, G., Lingner, A., Firzlaff, U., Wiegrebe, L., and Grothe, B. (2010). Perception and neural  
705 representation of size-variant human vowels in the Mongolian gerbil (*Meriones unguiculatus*).  
706 *Hearing Res* 261, 1-8.

707 Schneider, D.M., Nelson, A., and Mooney, R. (2014). A synaptic and circuit basis for corollary  
708 discharge in the auditory cortex. *Nature* 513, 189-194.

709 Schnupp, J.W., Booth, J., and King, A.J. (2003). Modeling individual differences in ferret external ear  
710 transfer functions. *J Acoust Soc Am* 113, 2021-2030.

711 Schnupp, J.W.H., Hall, T.M., Kokelaar, R.F., and Ahmed, B. (2006). Plasticity of temporal pattern  
712 codes for vocalization stimuli in primary auditory cortex. *Journal of Neuroscience* 26, 4785-4795.

713 Sharpee, T.O., Atencio, C.A., and Schreiner, C.E. (2011). Hierarchical representations in the auditory  
714 cortex. *Curr Opin Neurobiol* 21, 761-767.

715 Sinnott, J.M., Brown, C.H., and Brown, F.E. (1992). Frequency and intensity discrimination in  
716 Mongolian gerbils, African monkeys and humans. *Hear Res* 59, 205-212.

717 Smith, D.R.R., Patterson, R.D., Turner, R., Kawahara, H., and Irino, T. (2005). The processing and  
718 perception of size information in speech sounds. *Journal of the Acoustical Society of America* 117,  
719 305-318.

720 Stecker, G.C., and Hafter, E.R. (2002). Temporal weighting in sound localization. *Journal of the*  
721 *Acoustical Society of America* 112, 1046-1057.

722 Town, S.M., Atilgan, H., Wood, K.C., and Bizley, J.K. (2015). The role of spectral cues in timbre  
723 discrimination by ferrets and humans. *J Acoust Soc Am* 137, 2870-2883.

724 Town, S.M., and Bizley, J.K. (2013). Neural and behavioral investigations into timbre perception.  
725 *Front Syst Neurosci* 7, 88.

726 Town, S.M., Brimijoin, W.O., and Bizley, J.K. (2017). Egocentric and allocentric representations in  
727 auditory cortex. *Plos Biol* 15, e2001878.

728 Tsunada, J., Liu, A.S., Gold, J.I., and Cohen, Y.E. (2016). Causal contribution of primate auditory  
729 cortex to auditory perceptual decision-making. *Nat Neurosci* 19, 135-142.

730 Walker, K.M., Bizley, J.K., King, A.J., and Schnupp, J.W. (2011). Multiplexed and robust  
731 representations of sound features in auditory cortex. *J Neurosci* 31, 14565-14576.

732 Walker, K.M., Schnupp, J.W., Hart-Schnupp, S.M., King, A.J., and Bizley, J.K. (2009). Pitch  
733 discrimination by ferrets for simple and complex sounds. *The Journal of the Acoustical Society of*  
734 *America* 126, 1321-1335.

735 Whitton, J.P., Hancock, K.E., and Polley, D.B. (2014). Immersive audiomotor game play enhances  
736 neural and perceptual salience of weak signals in noise. *Proc Natl Acad Sci U S A* 111, E2606-2615.

737 Wood, K.C., Town, S.M., Atilgan, H., Jones, G.P., and Bizley, J.K. (2017). Acute Inactivation of Primary  
738 Auditory Cortex Causes a Sound Localisation Deficit in Ferrets. *PLoS One* 12, e0170264.

739 Zahorik, P., and Wightman, F.L. (2001). Loudness constancy with varying sound source distance. *Nat*  
740 *Neurosci* 4, 78-83.

741

## 742 **Methods**

### 743 **Animals**

744           Subjects were four pigmented female ferrets (1-5 years old) trained to discriminate vowels  
745 across fundamental frequency, sound level, voicing and location (Bizley et al., 2013a; Town et al.,  
746 2015). Each ferret was chronically implanted with Warp-16 microdrives (Neuralynx, MT) housing  
747 sixteen independently moveable tungsten microelectrodes (WPI Inc., FL) positioned over primary  
748 and posterior fields of left and right auditory cortex (Fig S2). Details of the surgical implantation  
749 procedures and histological confirmation of electrode position are described elsewhere (Bizley et al.,  
750 2013c). A further six ferrets (also pigmented females) implanted with the same microdrives were  
751 used as naïve animals for passive recording. These animals were trained in a variety of  
752 psychophysical tasks that did not involve the vowel sounds presented here.

753           Subjects were water restricted prior to testing; on each day of testing, subjects received a  
754 minimum of 60ml/kg of water either during testing or supplemented as a wet mash made from  
755 water and ground high-protein pellets. Subjects were tested in morning and afternoon sessions on  
756 each day for up to five days in a week. Test sessions lasted between 10 and 50 minutes and ended  
757 when the animal lost interest in performing the task.

758           The weight and water consumption of all animals was measured throughout the experiment.  
759 Regular otoscopic examinations were made to ensure the cleanliness and health of ferrets' ears.  
760 Animals were housed in groups of two or more animals in enriched housing conditions. All  
761 experimental procedures were approved by a local ethical review committee and performed under  
762 license from the UK Home Office and in accordance with the Animals (Scientific Procedures) Act  
763 1986.



## 764 **Apparatus**

765           Ferrets were trained to discriminate sounds in a customized pet cage (80 cm x 48 cm x 60  
766 cm, length x width x height) within a sound-attenuating chamber (IAC) lined with sound-attenuating  
767 foam. The floor of the cage was made from plastic, with an additional plastic skirting into which  
768 three spouts (center, left and right) were inserted. Each spout contained an infra-red sensor (OB710,  
769 TT electronics, UK) that detected nose-pokes and an open-ended tube through which water could be  
770 delivered.

771           Sound stimuli were presented through two loud speakers (Visaton FRS 8) positioned on the  
772 left and right sides of the head at equal distance and approximate head height. These speakers  
773 produce a smooth response ( $\pm 2$  dB) from 200Hz to 20 kHz, with an uncorrected 20 dB drop-off from  
774 200 to 20 Hz when measured in an anechoic environment using a microphone positioned at a height  
775 and distance equivalent to that of the ferrets in the testing chamber. An LED was also mounted  
776 above the center spout and flashed (flash rate: 3 Hz) to indicate the availability of a trial. The LED  
777 was continually illuminated whenever the animal successfully made contact with the IR sensor  
778 within the center spout until a trial was initiated. The LED remained inactive during the trial to  
779 indicate the expectation of a peripheral response and was also inactive during a time-out following  
780 an incorrect response.

781           The behavioral task, data acquisition, and stimulus generation were all automated using  
782 custom software running on personal computers, which communicated with TDT real-time signal  
783 processors (RZ2 and RZ6, Tucker-Davis Technologies, Alachua, FL).

## 784 **Task Design, Stimuli and Behavioral Testing**

785           Ferrets discriminated vowel identity in a two-alternative forced choice task described  
786 elsewhere (Town et al., 2015). Briefly, on each trial the animal was required to approach the center  
787 spout and hold head position for a variable period (0 – 500 ms) before stimulus presentation. Each

788 stimulus consisted of a 250 ms artificial vowel sound repeated once with an interval of 250 ms.  
789 Animals were required to maintain contact with the center spout until the end of the interval  
790 between repeats (i.e. 500 – 1000 ms after initial nose-poke) and could then respond at either left or  
791 right spout. Correct responses were rewarded with water delivery whereas incorrect responses led  
792 to a variable length time-out (3 - 8 s). To prevent animals from developing biases, incorrect  
793 responses were also followed by a correction trial on which animals were presented with the same  
794 stimuli. Correction trials and trials on which the animal failed to respond within the trial window (60  
795 s) were not analysed. The only exception to this protocol was for whispered sounds, which we  
796 presented as probe sounds in 10 – 20% of trials on which any response was rewarded and correction  
797 trials did not follow.

798 We also tested subjects under passive listening conditions, in which animals were provided  
799 with water at the center port to recreate the head position and motivational context occurring  
800 during task performance. Sounds were presented with the same two-token stimulus structure as  
801 during task performance, with a minimum of 1 second between stimuli. During test sessions, sound  
802 presentation began once the animal approached the center spout and began licking and ended  
803 when the animal became sated and lost interest in remaining at the spout.

804 Stimuli were artificial vowel sounds synthesized in MATLAB (MathWorks, USA) based on an  
805 algorithm adapted from Malcolm Slaney's Auditory Toolbox  
806 (<https://engineering.purdue.edu/~malcolm/interval/1998-010/>). The adapted algorithm simulates  
807 vowels by passing a sound source (either a click train, to mimic a glottal pulse train for voiced  
808 stimuli, or broadband noise for whispered stimuli) through a biquad filter with appropriate  
809 numerators such that formants are introduced in parallel. Four formants (F1-4) were modelled:  
810 three subjects were trained to discriminate /u/ (F1-4: 460, 1105, 2857, 4205 Hz) from /ε/ (730, 2058,  
811 2857, 4205 Hz) while one subject was trained to discriminate /a/ (936, 1551, 2975, 4263 Hz) from /i/  
812 (437, 2761, 2975, 4263 Hz). Selection of formant frequencies was based on previously published

813 data (Peterson and Barney, 1952; Town et al., 2015) and synthesis produced sounds consistent with  
814 the intended phonetic identity. Formant bandwidths were kept constant at 80, 70, 160 and 300 Hz  
815 (F1-4 respectively) and all sounds were ramped on and off with 5 ms cosine ramps.

816 To test perceptual constancy, we varied the rate of the pulse train to generate different  
817 fundamental frequencies and used broadband noise rather than pulse train to generate whispered  
818 vowel. For sound level we simply attenuated signals in software prior to stimulus generation. For  
819 sound location, we presented vowels only from the left or right speaker whereas for all other tests  
820 sounds were presented from both speakers. Across variations in F0, voicing and space, we fixed  
821 sound level at 70 dB SPL. For tests across sound level and location, voiced vowels were generated  
822 with 200 Hz fundamental frequency. Sound levels were calibrated using a Brüel & Kjær (Norcross,  
823 USA) sound level meter and free-field [1/2] inch microphone (4191) placed at the position of the  
824 animal's head during trial initiation.

## 825 **Neural Recording**

826 Neural activity in auditory cortex was recorded continuously throughout task performance.  
827 On each electrode, voltage traces were recorded using TDT System III hardware (RX8 and RZ2) and  
828 OpenEx software (Tucker-Davis Technologies, Alachua, FL) with a sample rate of 25 kHz. For  
829 extraction of action potentials, data were bandpass filtered between 300 and 5000 Hz and motion  
830 artefacts were removed using a decorrelation procedure applied to all voltage traces recorded from  
831 the same microdrive in a given session (Musial et al., 2002). For each channel within the array, we  
832 identified spikes (putative action potentials) as those with amplitudes between -2.5 and -6 times the  
833 RMS value of the voltage trace and defined waveforms of events using a 32-sample window  
834 centered on threshold crossings.

835 In the current study, waveform shapes were not sorted and data from multiple test sessions  
836 combined across days. The activity for each unit thus represents the unsorted multi-unit activity of a  
837 small population of cells at the recording site. We identified sound responsive units in task-engaged

838 animals as those whose stimulus evoked response within the 300 ms after onset of first token  
839 differed significantly from spontaneous activity in the 300 ms before making contact with the spout  
840 (Sign-rank test,  $p < 0.05$ ). In passive conditions, we identified responsive units using a similar  
841 comparison, but spontaneous activity was measured in the 300 ms before stimulus presentation.

## 842 **Decoding procedure**

843 We decoded stimulus features (e.g. vowel identity, F0 etc.) on single trials using a simple  
844 spike-distance decoder with leave-one-out cross-validation (LOCV). For every trial over which an  
845 individual unit was tested in a given dataset (e.g. vowels varied across F0 during task performance),  
846 we calculated template responses for each stimulus class (e.g. each vowel or each F0) as the mean  
847 PSTH of responses on all other trials. We then estimated the stimulus feature on the test trial as the  
848 template with the smallest Euclidean distance to the test trial (Fig S1A). Where equal distances were  
849 observed between test trial and multiple templates, we randomly estimated (i.e. guessed) which of  
850 the equidistant templates was the true stimulus feature. This procedure was repeated for all trials  
851 and decoding performance was measured as the percentage of trials on which the stimulus feature  
852 was correctly recovered. Although this approach was simple and did not account for the variance of  
853 neural activity, it provided a simple and intuitive relationship between neural activity and  
854 information content that we could use with small data sets (sample sizes down to five trials per  
855 condition). Robustness to sample size was particularly important because the animal's behavior  
856 determined the number of trials in each condition and we aimed to analyse as many units as  
857 possible rather than develop a more sophisticated decoder.

858 Auditory cortical units showed a wide variety of response profiles that made it difficult to  
859 select a single fixed time window over which to decode neural activity. To accommodate the  
860 heterogeneity of auditory cortical neurons and identify the time at which stimulus information  
861 arose, we repeated our decoding procedure using different time windows ( $n = 1550$ ) varying in start  
862 time (-0.5 to 1 s after stimulus onset, varied at 0.1 s intervals) and duration (10 to 500 ms, 10 ms

863 intervals) (Fig S1B). Within this parameter space we then reported the parameters that gave best  
864 decoding performance. Where several parameters gave best performance we reported the time  
865 window with earliest start time and shortest duration.

866 To assess the significance of decoding performance, we conducted a permutation test in  
867 which the decoding procedure (including temporal optimization) was repeated 100 times but with  
868 vowel identity randomly shuffled between trials to give a null distribution of decoder performance  
869 (Fig S1C). The null distribution of shuffled decoding performance was then parameterized and fitting  
870 a Gaussian probability density function, for which we then calculated the probability of observing  
871 the real decoding performance. Units were identified as informative when the probability of  
872 observing the real performance was less than 0.05. Parameterization of the null distribution was  
873 used to reduce the number of shuffled iterations over which decoding was repeated. This was  
874 necessary because the optimization search for best timing parameters dramatically increased the  
875 computational demands of decoding.

## 876 **Population Decoding**

877 To decode vowel identity from the single trial responses of populations of units, we simply  
878 summed the number of units that estimated each stimulus, weighted by the confidence of each  
879 unit's estimate, and took the stimulus with the maximum value as the population estimate. Weights  
880 for individual unit ( $w$ ) estimates were calculated as

$$w = \frac{d_{min}}{\sum_{j=1}^n d_j}$$

881 Where  $n$  was the number of stimulus classes (e.g. vowel identities) and  $d$  was the spike distance  
882 between a test trial response and response templates generated for each stimulus class. Here,  $d_{min}$   
883 represents the minimum spike distance that indicated the estimated stimulus for that unit.

884 We tested populations of up to 35 units, by which point decoder performance had typically  
885 saturated at 100% (with the exception of decoding F0 and sound level across larger [n = 5] numbers  
886 of feature classes [e.g. 149, 200, 263, 330 and 459 Hz]). Populations were constructed first by  
887 selecting the top 35 units that performed best at decoding the relevant parameter at the individual  
888 unit level. Within this subpopulation, we randomly sampled 100 combinations of units without  
889 replacement from the large number of possible combinations of units available.

## 890 **Data Analysis**

891 **Behavior:** Perceptual constancy was reported when the orthogonal factor did not significantly affect  
892 task performance, i.e. the likelihood of responding correctly. To test this, we analysed the proportion  
893 of correct trials as a function of each orthogonal dimension (e.g. F0) using a logistic regression (Table  
894 S1). Regressions were performed separately for each animal, and each orthogonal dimension, and  
895 any significant effect ( $p < 0.05$ ) was reported as a failure of constancy. We also asked if an animal's  
896 performance at specific orthogonal values was better than chance (50%) using a binomial test ( $p <$   
897  $0.001$ , Table S2).

898 **Neural activity:** The times of spikes was referenced to the onset of the stimulus on each trial and  
899 used to create raster and peri-stimulus time histograms. In our analysis of task engagement and  
900 training, we measured on each trial the firing rate in 100 ms bins after stimulus onset at 50 ms  
901 intervals. For paired comparisons, firing rates in engaged and passively listening animals was  
902 compared using a Wilcoxon sign-rank test. For unpaired analyses, we normalized firing rates in these  
903 bins relative to the firing rate in a pre-stimulus baseline period in the 450 ms before stimulus onset  
904 (passively listening animals) or before the animal began waiting at the center spout (task-engaged  
905 animals). Across passively listening groups presented with familiar / unfamiliar sounds (Fig 8E), we  
906 compared normalized firing rates and baseline firing rates (i.e. the normalization factors in each  
907 condition) across groups using a Kruskal-Wallis test with pairwise post-hoc comparisons performed  
908 with Tukey-Kramer correction for multiple comparisons.

909 **Individual unit decoding:** In addition to classifying whether units were informative about a particular  
910 stimulus feature (permutation test,  $p < 0.05$ ), we also compared decoding performances (Fig 5B, 5D,  
911 6D, 7B, 7F, 8E, S6E, S7, S9A and S10A). When comparing decoding performance across more than  
912 two conditions (i.e. in passively listening animals; Fig 8E), data were analysed using a Kruskal-Wallis  
913 test with Tukey-Kramer corrected post-hoc comparisons where relevant. When comparing two  
914 conditions directly, we used a Wilcoxon sign-rank test for paired data (e.g. comparing performance  
915 on correct and error trials; Fig 5B). For comparison of changes in decoding performance between  
916 conditions (e.g. decoding sound identity vs. choice on correct and error trials; Fig. 5E), we used a  
917 Wilcoxon rank-sum comparison for unpaired data.

918 **Timing:** For each unit, we determined the timing window for which we achieved best decoding  
919 performance (Fig S1B) and took the window center (Fig 3), start time (Fig S4) or window duration  
920 (Fig S5). We then compared the change in parameter value (e.g. change in center time) for best  
921 decoding of between vowel identity and orthogonal dimensions using a Wilcoxon rank-sum test (Fig  
922 3A-D). The same approach was used when comparing the timing of decoding vowel identity and F0  
923 in task-engaged and passively listening animals (Fig 7G). We also compared the times of best  
924 decoding of vowel identity across orthogonal dimensions using a Kruskal-Wallis anova with Tukey-  
925 Kramer correction for post-hoc comparisons (Fig 3E). We used the same approach to compare the  
926 decoding of orthogonal dimensions (Fig 3F) and decoding of vowel identity, behavioral choice and  
927 accuracy (Fig 6F).

928 **Population decoding:** For each unit in a given population, we generated estimates of the target  
929 value on each trial based on the minimum spike distance from templates generated on all other  
930 trials (i.e. the same LOCV method as for individual unit decoding – see above). Templates were  
931 generated using the timing parameters that gave best decoding in the individual unit case and thus  
932 each unit's response was sampled independently. In addition to an estimated target value, we also  
933 retained a confidence score for that estimate: the spike distance from test trial to the closest

934 template, expressed as a proportion of the sum of spike distances between test trial and all  
935 templates. Across the population, we then summed confidence scores for each possible target value  
936 and selected the value with the largest sum as the population estimate for a given trial. We then  
937 repeated the procedure across trials to get the decoding performance of a given population.

938 We summarized the relationship between population size and decoding performance by  
939 fitting a logistic regression model to the proportion each population scored correct, with population  
940 size as a predictor. To compare population decoding across conditions (e.g. decoding vowel identity  
941 or sound location; Fig 4B) we fitted a logistic model with and without the condition as an additional  
942 predictor and assessed significance of improvement in model fit using an analysis of deviance.

943 **Error trial analysis:** We trained the decoder on correct trials using the LOCV procedure to estimate  
944 vowel identity on each individual correct trial from templates built on all-other correct trials. For  
945 error trials, we used the training templates calculated across all correct trials and estimated vowel  
946 identity on each error trial. Only units that were informative about vowel identity were analysed,  
947 with the exception of three units recorded when the animal performed perfectly (i.e. made no  
948 errors) when vowels varied across sound location and thus error trials could not be studied. We  
949 repeated the same procedure for decoding orthogonal variables using only units informative about  
950 the relevant dimension. Decoding performance was compared for vowel identity (Fig 5B),  
951 orthogonal values (Fig S6) and for behavioral choice (Fig. 5D) using a Wilcoxon sign-rank test. We  
952 compared the change in decoding performance between correct and error trials when decoding  
953 vowel identity and behavioral choice using a Wilcoxon rank-sum test (Fig 5E).

954 **Datasets matched for vowel, choice and accuracy:** To study the tolerance of a given unit to  
955 behavioral as well as acoustic variables, we subsampled neural responses from all conditions in  
956 which animals showed perceptual constancy: Specifically we included sounds varied across F0,  
957 sound location and sound level above 60 (three ferrets) or 70 dB SPL (one ferret). We excluded all  
958 data when sounds were whispered. To prevent trial outcome (water reward or timeout) from



959 confounding accuracy signals, we also excluded trials on which animals responded within one  
960 second of stimulus onset. Following pooling and exclusion, we balanced data sets for the number of  
961 each vowel, choice and trial outcome by randomly selecting  $N$  trials, where  $N$  was the minimum  
962 number of trials in which any one condition (e.g. left responses to /u/) was tested. As with our  
963 earlier decoding analysis, we only considered units for which  $N \geq 5$ . We then decoded vowel identity,  
964 behavioral choice and accuracy using the same LOCV decoding procedure described above. We  
965 compared decoding performance for vowel identity, choice and accuracy across all units with a  
966 Kruskal-Wallis anova and post-hoc comparisons using the Tukey-Kramer correction (Fig 6D).

967 **Supplemental Tables**

968 **Table S1**

969 Results of logistic regressions comparing performance across orthogonal variables.

| Ferret | Orthogonal Dimension                   |                                    |                                    |                                           |
|--------|----------------------------------------|------------------------------------|------------------------------------|-------------------------------------------|
|        | F0<br>(149, 200, 263, 330 &<br>459 Hz) | Voicing<br>(Voiced /<br>Whispered) | Sound Level<br>(45 – 82.5 dB SPL)  | Location<br>(±90°)<br>(i.e. Left / Right) |
| F1201  | <i>df</i> = 12034, <i>p</i> = 0.7731   | <i>df</i> = 5802, <i>p</i> < 0.001 | <i>df</i> = 3490, <i>p</i> < 0.001 | <i>df</i> = 879, <i>p</i> = 0.219         |
| F1203  | <i>df</i> = 9945, <i>p</i> = 0.764     | <i>df</i> = 4212, <i>p</i> < 0.001 | <i>df</i> = 3063, <i>p</i> = 0.005 | <i>df</i> = 701, <i>p</i> = 0.185         |
| F1217  | <i>df</i> = 4790, <i>p</i> = 0.368     | <i>df</i> = 3784, <i>p</i> < 0.001 | <i>df</i> = 2214, <i>p</i> < 0.001 | <i>df</i> = 145, <i>p</i> = 0.523         |
| F1304  | <i>df</i> = 1485, <i>p</i> = 0.388     | <i>df</i> = 617, <i>p</i> = 0.002  | <i>df</i> = 455, <i>p</i> = 0.882  | <i>Not tested</i>                         |

970

971 **Table S2**

972 Comparison of observed vowel discrimination against chance performance (50%); data shown as  
973 fraction of trials correct and probability of observed performance (binomial test). Orthogonal values  
974 tested separately for voicing and sound level when a significant main effect of orthogonal value was  
975 observed on behavioral performance (Table S1).

976

|                         |           | Ferret                                |                                     |                                     |                                     |
|-------------------------|-----------|---------------------------------------|-------------------------------------|-------------------------------------|-------------------------------------|
| Dimension               | Data Set  | F1201                                 | F1203                               | F1217                               | F1304                               |
| F0                      | All       | 10214 / 12036<br>84.9%<br>$p < 0.001$ | 8502 / 9947<br>85.5%<br>$p < 0.001$ | 3946 / 4792<br>82.4%<br>$p < 0.001$ | 1051 / 1487<br>70.7%<br>$p < 0.001$ |
| Voicing                 | Voiced    | 3830 / 4472<br>85.6%<br>$p < 0.001$   | 2833 / 3207<br>88.3%<br>$p < 0.001$ | 2585 / 3038<br>85.1%<br>$p < 0.001$ | 333 / 473<br>70.4%<br>$p < 0.001$   |
|                         | Whispered | 870 / 1332<br>65.3%<br>$p < 0.001$    | 596 / 1007<br>59.2%<br>$p < 0.001$  | 386 / 748<br>51.6%<br>$p = 0.400$   | 83 / 146<br>56.9%<br>$p = 0.116$    |
| Sound level<br>(dB SPL) | 45        | 138 / 186<br>74.2%<br>$p < 0.001$     | 149 / 196<br>76.0%<br>$p < 0.001$   | <i>Not tested</i>                   | <i>Not tested</i>                   |
|                         | 52.5      | 151 / 193<br>78.2%<br>$p < 0.001$     | 169 / 205<br>82.4%<br>$p < 0.001$   | <i>Not tested</i>                   | <i>Not tested</i>                   |
|                         | 60        | 161 / 192<br>83.9%<br>$p < 0.001$     | 162 / 188<br>86.2%<br>$p < 0.001$   | <i>Not tested</i>                   | <i>Not tested</i>                   |
|                         | 64.5      | 438 / 498<br>88.0%<br>$p < 0.001$     | 372 / 414<br>89.9%<br>$p < 0.001$   | 341 / 442<br>77.2%<br>$p < 0.001$   | <i>Not tested</i>                   |
|                         | 67.5      | 175 / 195<br>89.7%<br>$p < 0.001$     | 176 / 198<br>88.9%<br>$p < 0.001$   | <i>Not tested</i>                   | <i>Not tested</i>                   |
|                         | 69        | 479 / 523<br>91.6%<br>$p < 0.001$     | 357 / 397<br>89.9%<br>$p < 0.001$   | 345 / 449<br>76.8%<br>$p < 0.001$   | <i>Not tested</i>                   |
|                         | 73.5      | 460 / 515<br>89.3%<br>$p < 0.001$     | 352 / 407<br>86.5%<br>$p < 0.001$   | 380 / 457<br>83.2%<br>$p < 0.001$   | <i>Not tested</i>                   |
|                         | 75        | 168 / 187<br>89.8%<br>$p < 0.001$     | 179 / 197<br>90.9%<br>$p < 0.001$   | <i>Not tested</i>                   | <i>Not tested</i>                   |
|                         | 78        | 445 / 501<br>88.8%<br>$p < 0.001$     | 382 / 434<br>88.0%<br>$p < 0.001$   | 392 / 442<br>88.7%<br>$p < 0.001$   | <i>Not tested</i>                   |
|                         | 82.5      | 445 / 500<br>89.0%<br>$p < 0.001$     | 357 / 424<br>84.2%<br>$p < 0.001$   | 366 / 424<br>86.3%<br>$p < 0.001$   | <i>Not tested</i>                   |
|                         | All       | <i>Not tested</i>                     | <i>Not tested</i>                   | <i>Not tested</i>                   | 309 / 455<br>67.9%<br>$p < 0.001$   |
| Location                | All       | 701 / 879<br>79.8%<br>$p < 0.001$     | 564 / 703<br>80.2%<br>$p < 0.001$   | 112 / 145<br>77.2%<br>$p < 0.001$   | <i>Not tested</i>                   |

## 977 Supplemental Figures

### 978 Fig S1 Decoder structure

979 **(A)** Schematic showing the decoding of trial parameters (e.g. vowel identity) from single trial neural  
980 responses for one unit. We used a leave-one-out cross validation method in which templates were  
981 calculated as the mean response to each stimulus class (e.g. vowel) on all but one test trial of the  
982 data set. Mean responses were averaged across trials from spike times within a decoding window  
983 binned at 10 ms intervals. For the test trial, the decoded estimate of stimulus class was assigned as  
984 the template class with the smallest Euclidean distance to the test response. Every trial in the  
985 dataset was decoded as a test trial with templates recalculated from all other trials.

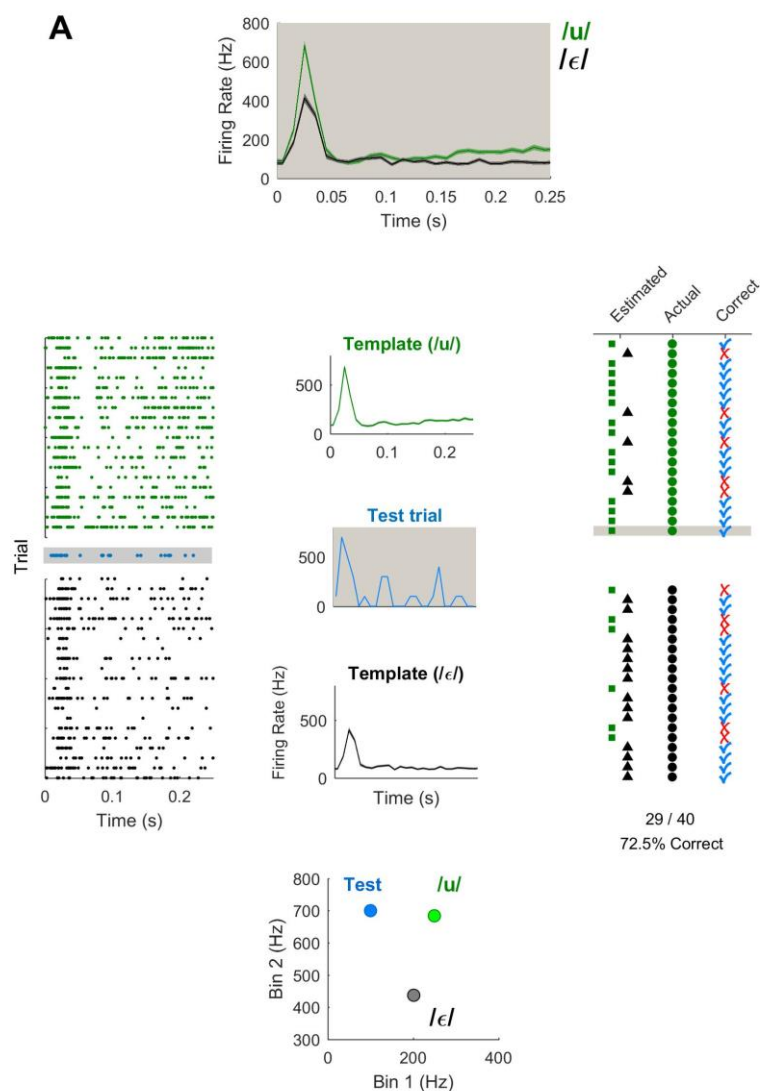

986

987 **(B)** Optimizing timing parameters. To accommodate potential variation in timing of information  
988 content, we varied the temporal parameters (start time and duration) that defined the decoding  
989 window. Start time was varied from -0.5 to 1 s after stimulus onset in 50 ms intervals; duration was  
990 varied between 10 and 500 ms in 10 ms intervals. For each combination of start time and duration,  
991 we calculated decoding performance across trials and mapped temporal parameter space using a  
992 simple grid search. While this search protocol may not find the true optimal parameters for best  
993 decoding performance, it nonetheless enabled us to improve decoding performance and estimate  
994 those times in the trial at which information about a given feature was most strongly represented.

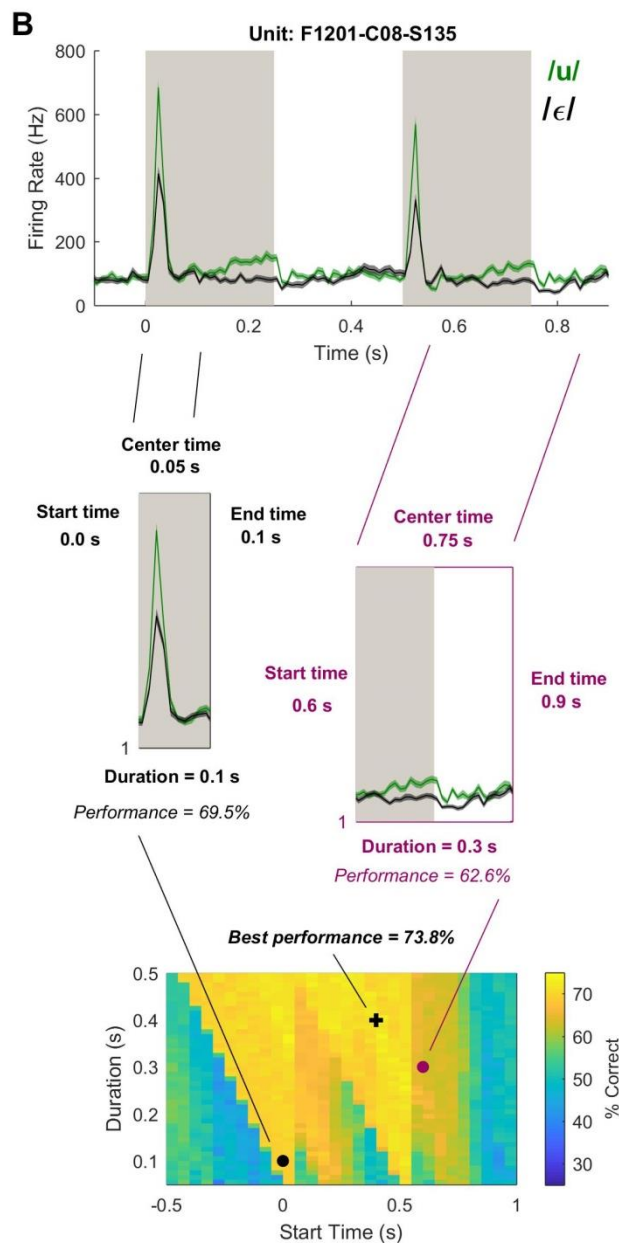

995

996 **(C)** Permutation testing of decoder performance. Each test variable (e.g. vowel identity) was shuffled  
997 and the decoding was repeated with the full optimization search. For each unit, we repeated this  
998 shuffling procedure on 100 iterations (we used a relatively small number of iterations and  
999 parameterized the permutation distribution to compromise for the computational cost of  
1000 optimization). When shuffled, PSTH responses to each vowel were virtually identical. To determine  
1001 whether a unit was informative, we fitted the distribution of best performance values obtained for  
1002 each shuffle and calculated the probability of measuring the observed decoding performance.

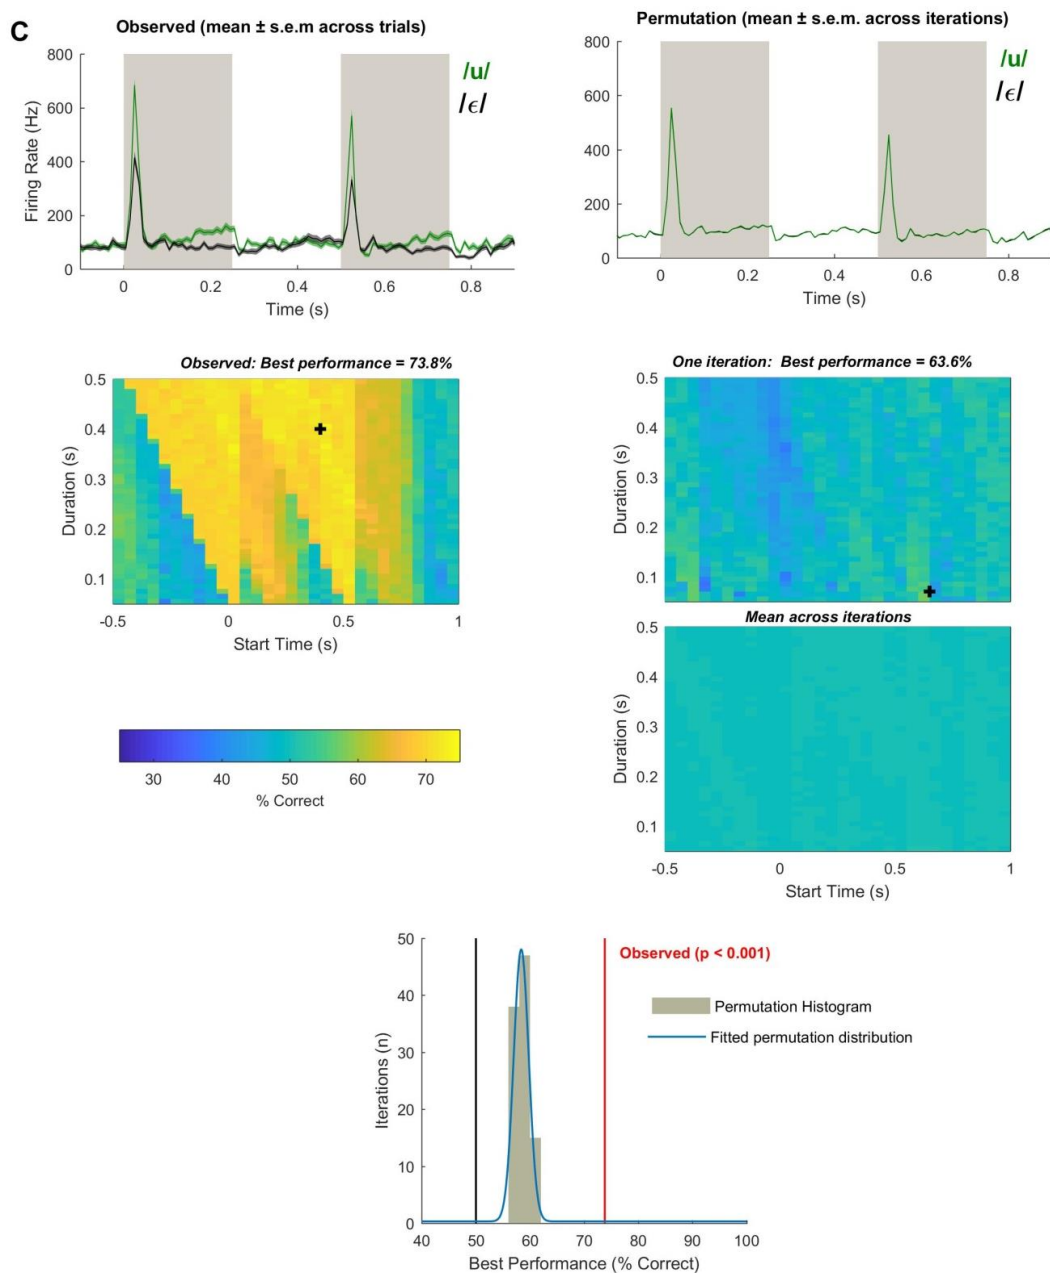

1003

1004 **Fig S2 Improvement in decoding performance with optimization of time window parameters**

1005 Comparison of performance decoding vowel identity using neural responses in a fixed duration (100  
1006 ms centered at different times after stimulus onset) or using optimized time window. Data show  
1007 mean  $\pm$  s.e.m. with individual data points showing individual units for optimized data. For each time  
1008 point, optimized decoding performance was significantly better than fixed window performance  
1009 (Bonferroni corrected for multiple comparisons,  $p < 1 \times 10^{-10}$ ).

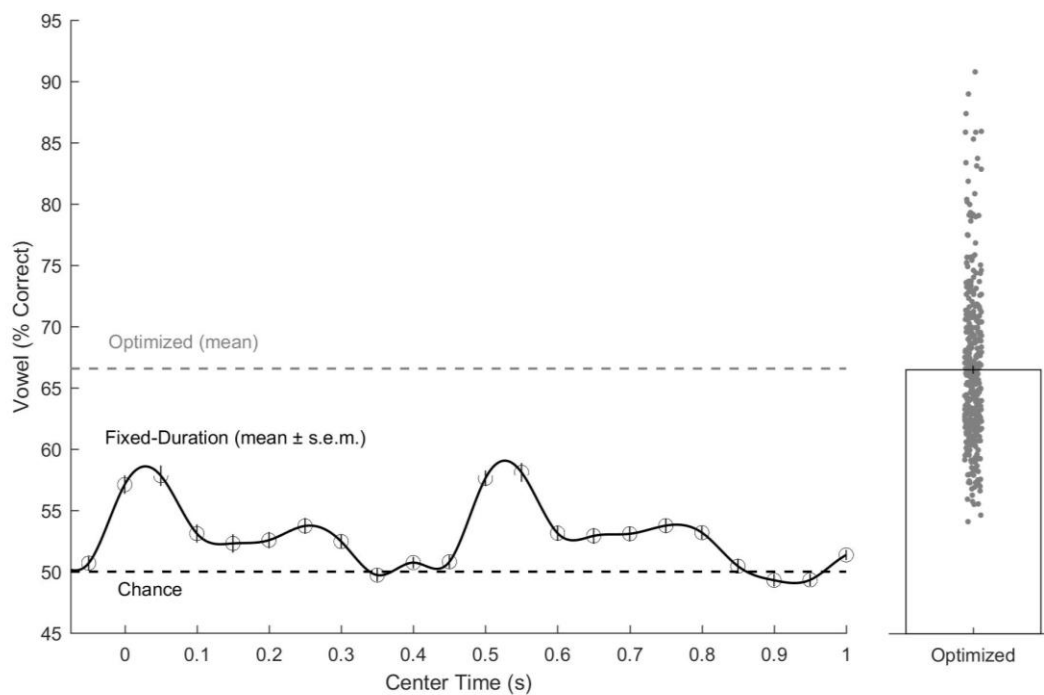

1010

1011



1012 **Fig S3 Decoder performance vs. feature set size**

1013 Population decoding performance for two and five way classification. Data shown as logistic  
1014 regression model fits for all populations tested (see Fig 5 of the main text for examples of original  
1015 data).

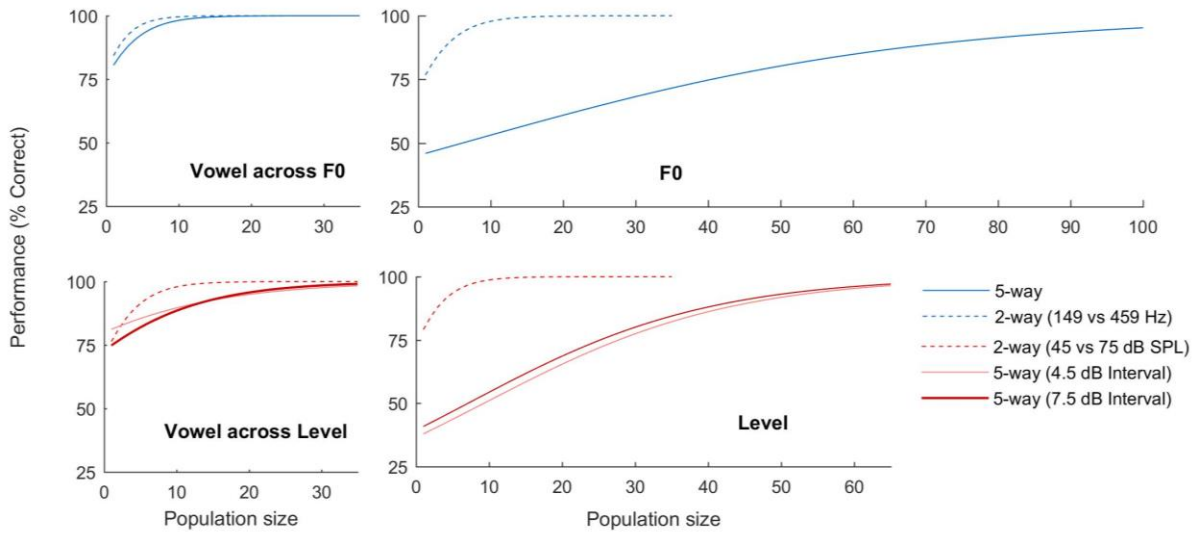

1016

1017 **Fig S4 Temporal profiles for the onset (start time) of best decoding windows**

1018 **(A-D)** Cumulative distributions showing start time for best performance when decoding vowel  
 1019 identity or orthogonal variables (**A:** F0, **B:** location, **C:** level and **D:** voicing). Units are shown  
 1020 separately by classification as informative about vowel identity and orthogonal values (Dual feature  
 1021 units), or only vowel identity or orthogonal values (Single feature units). **(E)** CDFs for decoding vowel  
 1022 identity across each orthogonal variable. **(F)** CDFs for decoding orthogonal values across vowels.  
 1023 Asterisks show significant differences between vowel and orthogonal (A-D, rank-sum or sign-rank  
 1024 depending on pairing,  $p < 0.05$ ) or across orthogonal variables (Kruskal-Wallis,  $p < 0.05$ ).

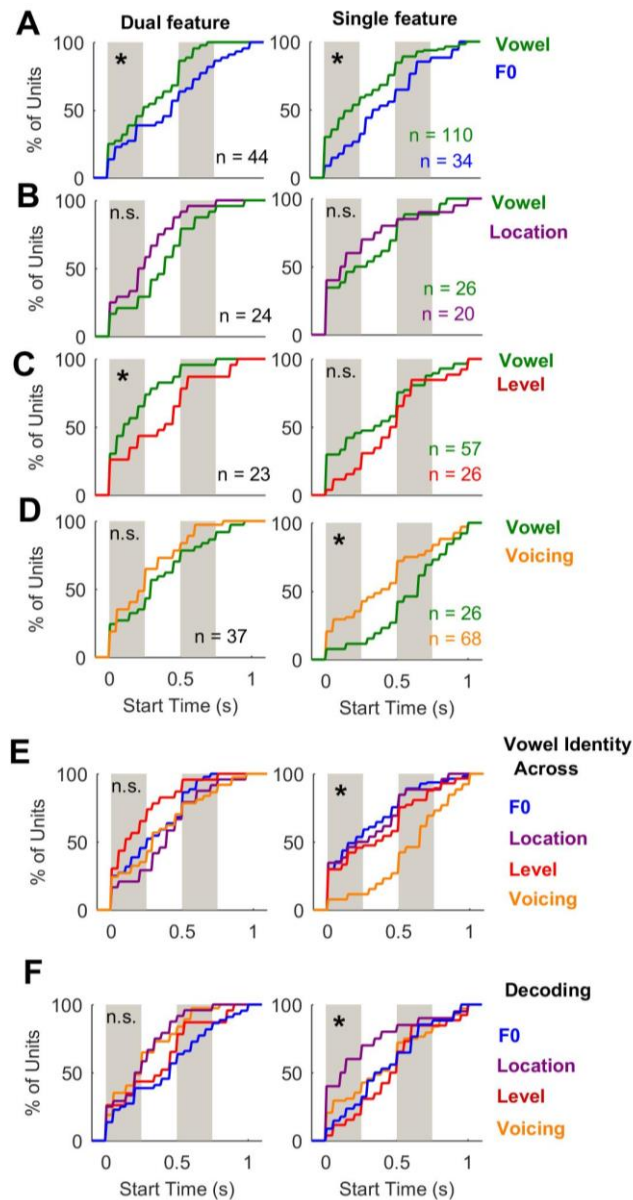

1025

1026 **Fig S5 Temporal profiles for the duration of best decoding windows**

1027 **(A-D)** Cumulative distributions showing duration for best performance when decoding vowel identity  
1028 or orthogonal variables (**A:** F0, **B:** location, **C:** level and **D:** voicing). Units are shown separately by  
1029 classification as informative about vowel identity and orthogonal values (Dual feature units), or only  
1030 vowel identity or orthogonal values (Single feature units). **(E)** CDFs for decoding vowel identity  
1031 across each orthogonal variable. **(F)** CDFs for decoding orthogonal values across vowels. Asterisks  
1032 show significant differences between vowel and orthogonal (A-D, rank-sum or sign-rank depending  
1033 on pairing,  $p < 0.05$ ) or across orthogonal variables (Kruskal-Wallis,  $p < 0.05$ ).

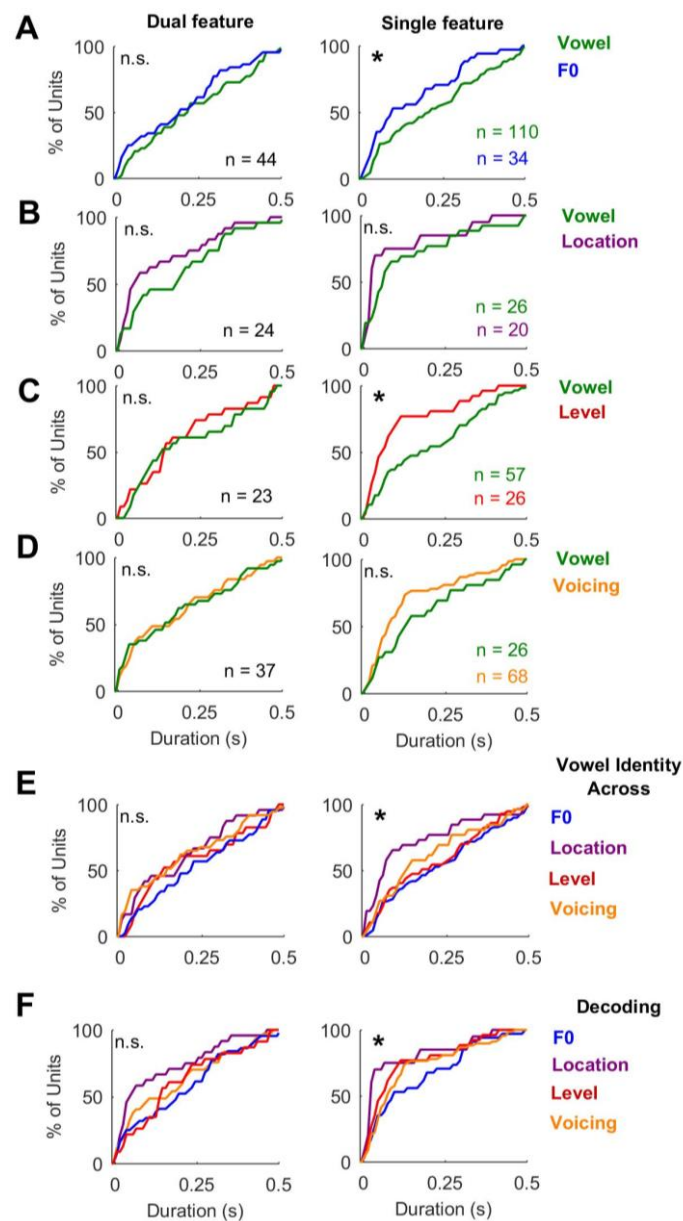

1034

1035 **Fig S6 Encoding of orthogonal variables on correct and incorrect trials**

1036 **(A-D)** Example units show encoding of orthogonal variables on correct and error trials. Data is shown  
 1037 as mean  $\pm$  s.e.m. **(E-F)** Change in decoding performance from correct to error trials. Asterisks show  
 1038 significant comparisons (paired t-test: F0:  $t_{77} = -10.3$ ,  $p = 3.42 \times 10^{-16}$ , across location:  $t_{40} = -4.82$ ,  $p =$   
 1039  $2.12 \times 10^{-5}$ , across sound level:  $t_{48} = -6.98$ ,  $p = 7.85 \times 10^{-9}$ , across voicing:  $t_{104} = -11.9$ ,  $p = 4.52 \times 10^{-21}$ )

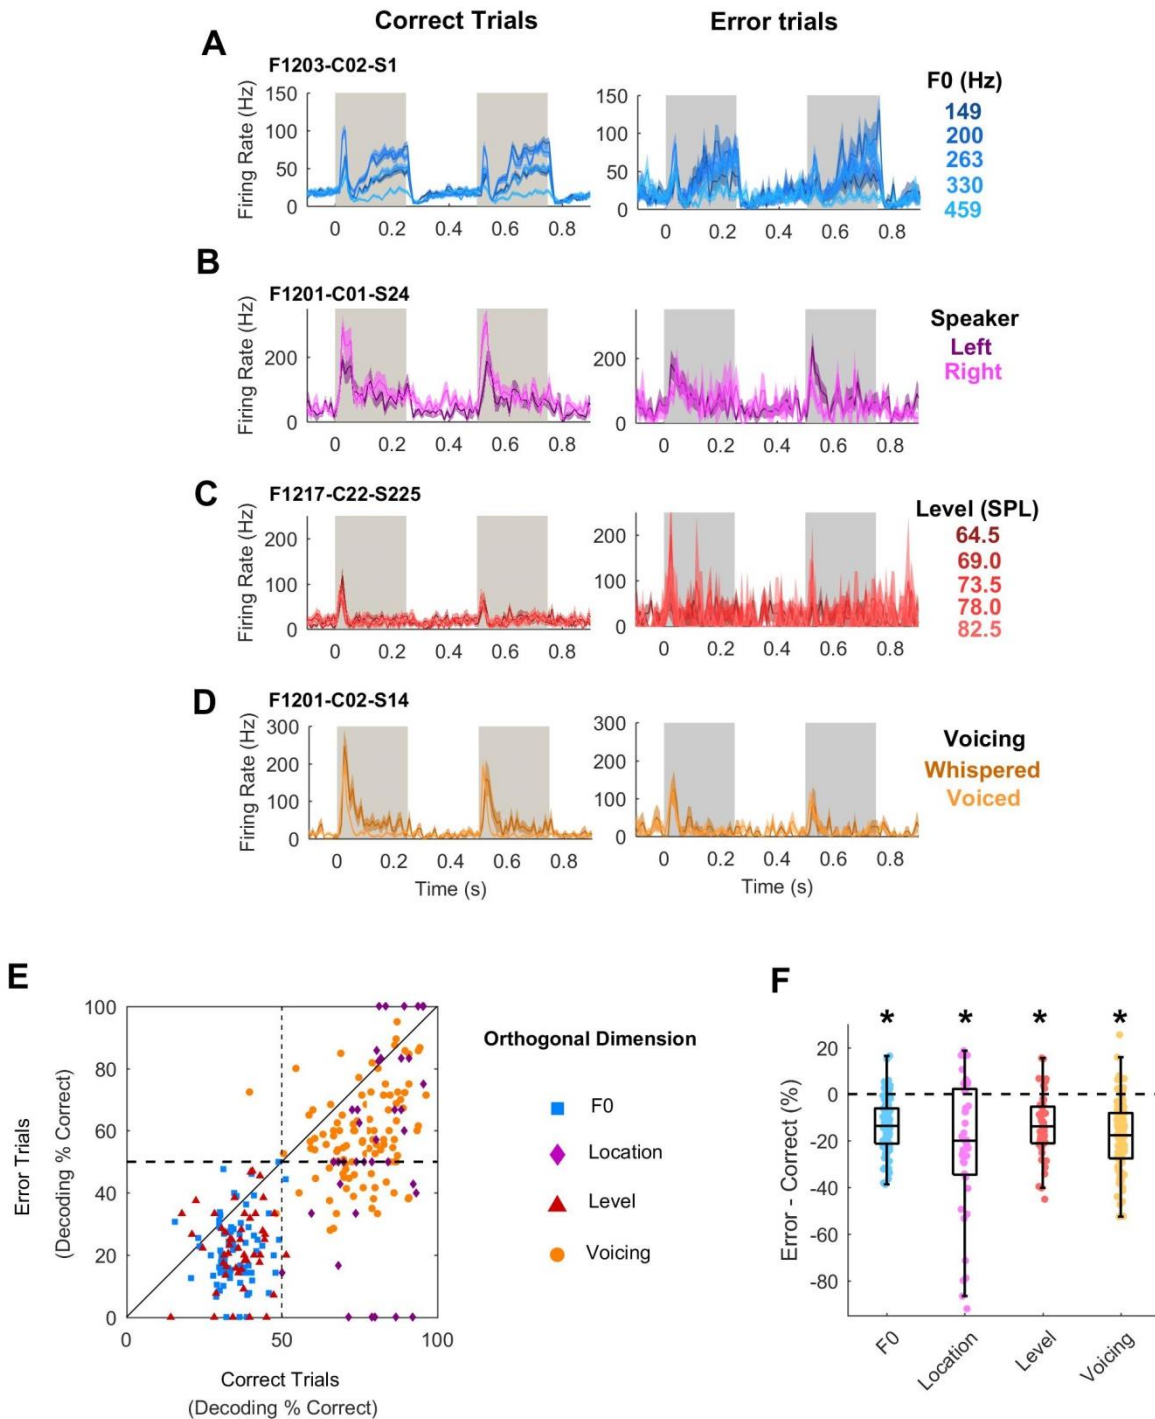

1040

1041 **Fig S7 Error trial decoding performance using a fixed decoding window**

1042 Decoding of vowel identity (**A**), orthogonal values such as F0 or sound level (**B**) and behavioral  
1043 response (**C**) on correct and error trials using a fixed time window in the first stimulus presentation  
1044 (0 to 250 ms). There was no consistent difference between correct and error trials when decoding  
1045 vowel identity or orthogonal values ( $p > 0.1$  for all comparisons). However decoding the animal's  
1046 response direction was worse on error than correct trials (Across F0:  $t_{153} = -12.1$ ,  $p = 3.40 \times 10^{-24}$ ,  
1047 across location:  $t_{45} = -5.5$ ,  $p = 1.93 \times 10^{-6}$ , across sound level:  $t_{79} = -8.1$ ,  $p = 5.77 \times 10^{-12}$ , across voicing:  
1048  $t_{62} = -4.7$ ,  $p = 1.45 \times 10^{-5}$ ). The effects of trial accuracy were greater on behavioral response than  
1049 stimulus identity when sounds varied across F0 ( $t_{306} = 8.4$ ,  $p = 2.15 \times 10^{-15}$ ), across location ( $t_{90} = 3.8$ ,  
1050  $p = 2.94 \times 10^{-4}$ ), across sound level ( $t_{158} = 5.3$ ,  $p = 3.90 \times 10^{-7}$ ) and across voicing ( $t_{124} = 2.9$ ,  $p = 0.004$ ).

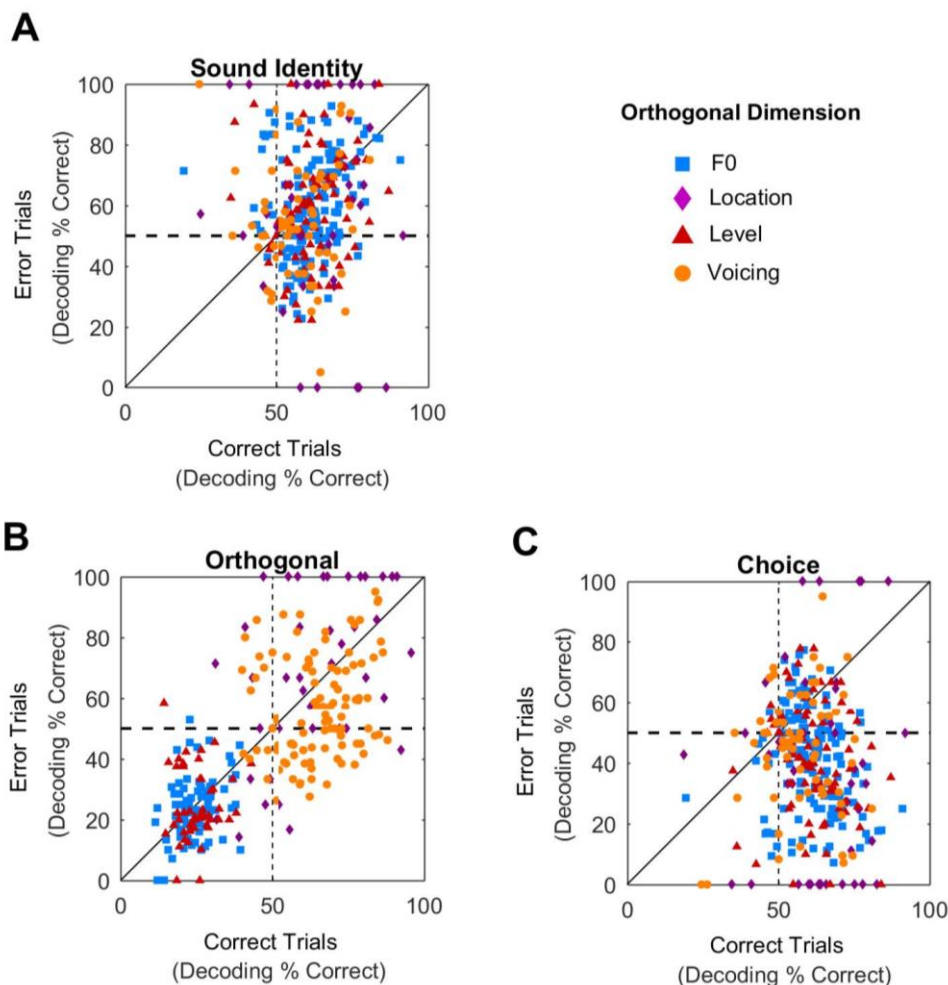

1051

1052 **Fig S8 Example responses during task engagement and passive listening**

1053 Sound-evoked responses of individual unit examples, in task-engaged and passively listening, trained

1054 and untrained animals to trained and untrained vowels. Plots show mean  $\pm$  s.e.m. firing rate.

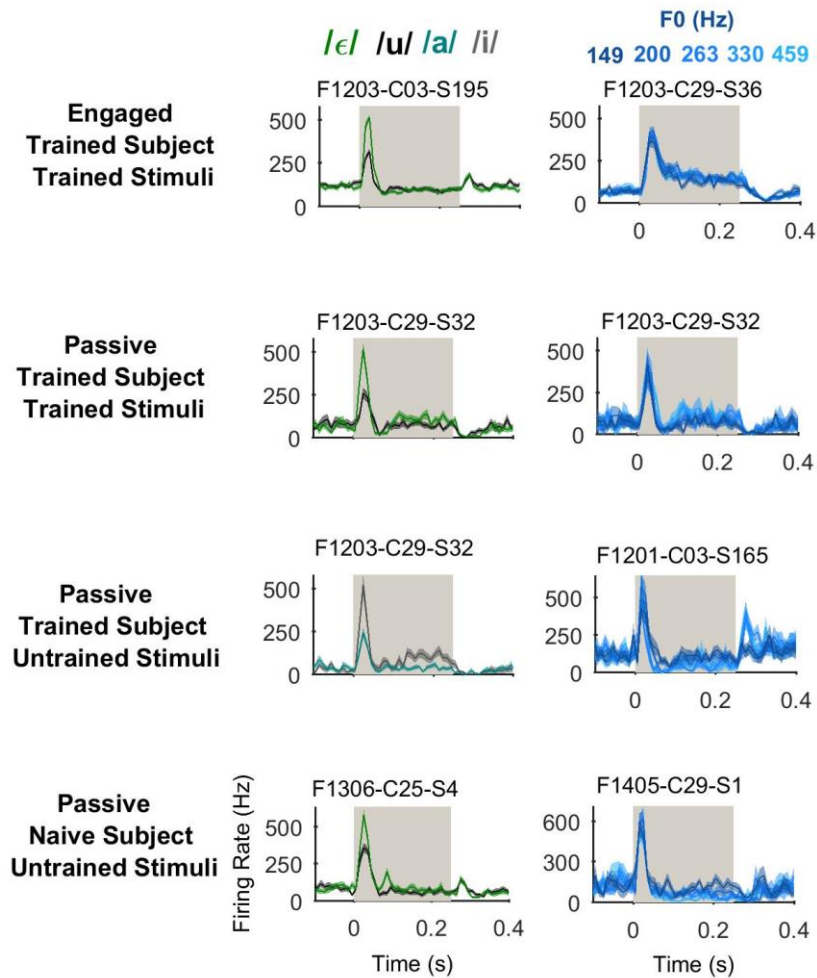

1055

1056

1057 **Fig S9 Example responses during task engagement and passive listening**

1058 (A) Firing rate in the time window that gave best performance decoding F0 (optimized  
1059 independently for each unit in each experimental condition [passive/ engaged]). Data points indicate  
1060 individual units (B) Paired comparison of best performance decoding F0 in optimized time windows.  
1061 Data is shown as in (A). Asterisks show significant engagement-related suppression ( $p < 0.05$ ).

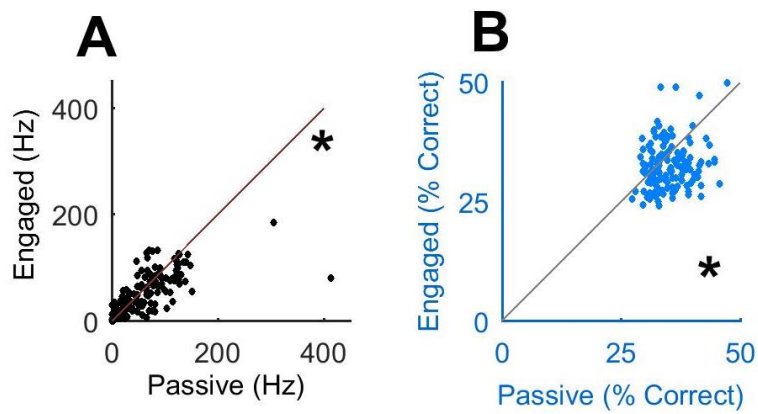

1062

1063 **Fig S10 Effects of training on spiking activity and performance in time windows optimized for**  
1064 **decoding F0**

1065 **(A-B)** Comparison of spiking activity normalized to baseline firing (A) and best performance decoding  
1066 F0 (B) in optimized time window. Individual data points show individual units; box plots show  
1067 median and inter-quartile ranges. Data also shown for task engaged responses for reference.  
1068 Asterisks show significant comparisons between experimental groups: Normalized firing rates did  
1069 not differ significantly between neurons recorded in any passive conditions, or between units  
1070 responding to trained sounds during task engagement and passive listening. Decoding performance  
1071 across all units differed significantly between groups (Kruskal-Wallis anova,  $\chi^2 = 21.0$ ,  $p = 2.76 \times 10^{-5}$ )  
1072 with decoding being significantly worse in units recorded from trained than naïve animals (Tukey-  
1073 Kramer corrected for multiple comparisons,  $p = 1.0 \times 10^{-4}$ ), and worse for units responding to trained  
1074 than untrained sounds ( $p = 0.007$ ). Performance decoding F0 of untrained sounds in naïve and  
1075 trained animals was not significantly different ( $p = 0.935$ ). Decoding performance of units responding  
1076 to trained sounds during task engagement was significantly worse than when passively listening ( $z =$   
1077  $9.81$ ,  $p = 1.06 \times 10^{-8}$ ).

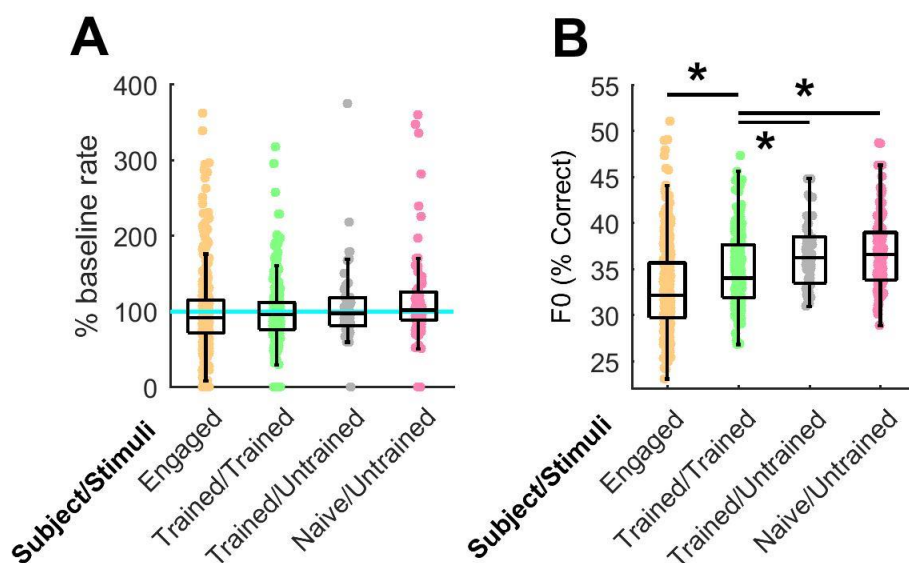

1078
